# Supplementary material for: Low-Magnitude Mechanical Signals to Preserve Skeletal Health in Female Adolescents With Anorexia Nervosa: A Randomized Clinical Trial
Source: PubMed Central journal article supplement (PMC11528308; doi:10.1001/jamanetworkopen.2024.41779), 2024-10-31
Supplement: jamanetwopen-e2441779-s001.pdf [file jamanetwopen-e2441779-s001.pdf]

1 **A. Introduction:**

2 The peak bone mass achieved during adolescence is a major determinant of bone density and bone strength  
3 in adulthood<sup>1,2</sup>. Thus, any condition that interferes with bone accrual during this critical time period has  
4 important long-term health implications. Anorexia nervosa (AN), a disorder characterized by malnutrition, fear  
5 of weight gain, and amenorrhea, is becoming increasingly prevalent among adolescents<sup>3,4</sup>. Accompanying this  
6 disease are significant changes in the normal hormonal milieu, loss of lean body mass secondary to  
7 malnutrition, and frequent restrictions on the level of weight-bearing physical activity. Early bone loss is seen in  
8 over half of these patients<sup>5-7</sup>. Studies have shown that this decreased bone mineral density (BMD) often does  
9 not return to pre-illness levels even following weight restoration<sup>4-6</sup>. The skeletal health implications are  
10 substantial, and there is a pressing need to develop better methods to prevent bone loss before it occurs.

11  
12 Hospitalization for patients with AN is frequently accompanied by bed rest; this relative immobilization is driven  
13 by the need to assure adequate caloric balance, as well as to address concerns that arise regarding cardiac  
14 status. However, bed rest has been shown to increase the risk of bone loss in a number of conditions<sup>8,9</sup> and  
15 may compound skeletal losses in AN. Our research has shown that even short-term immobilization leads to  
16 changes in bone turnover markers for these ill adolescents. Prospective, well-designed clinical studies are  
17 needed to optimize medical management and establish evidence-based protocols for the treatment of this  
18 disorder. The primary focus of the scientific portion of this K23 application is to conduct two randomized,  
19 controlled trials: a *prospective short-term* intervention to attempt to prevent an imbalance of bone turnover in  
20 hospitalized patients with AN, and to determine the *long-term* effects of a biomechanical intervention on  
21 skeletal health in ambulatory adolescents with AN. This innovative study will utilize a novel intervention of high-  
22 frequency, low magnitude mechanical signals (LMMS) delivered via a vibrating platform in an attempt to  
23 stimulate bone formation. Additionally, this project proposes to study mechanisms of bone loss through the  
24 use of bone biomarkers and novel imaging techniques including <sup>18</sup>F-fluoride positron emission tomography  
25 (<sup>18</sup>F-PET) of the skeleton to localize areas of acute bone formation, axial quantitative computed tomography  
26 (QCT), and peripheral quantitative computed tomography (pQCT) to quantify cortical BMD, trabecular BMD,  
27 and cross-sectional geometry measures that determine the load capacity and fracture risk of a bone.

28  
29 **Specific Aim 1: To conduct a randomized, controlled trial to determine the effect of short-term LMMS**  
30 **on bone turnover in adolescents who are hospitalized for AN.**

31 Hypothesis 1A: Adolescents with AN (n=30) who receive daily LMMS during hospitalization will have increased  
32 areas of bone formation as evaluated by quantitative <sup>18</sup>F-PET of the axial skeleton after 5 days of relative  
33 immobilization as compared to admission. The placebo group (n=30) will exhibit no change in bone formation  
34 on <sup>18</sup>F-PET measurements obtained between admission (Day 1) and Day 5.

35 Hypothesis 1B: LMMS will be anabolic to bone, such that adolescents with AN who are randomized to LMMS  
36 treatment will have increased levels of bone formation markers and decreased bone resorption markers  
37 compared to a control group of AN patients receiving placebo treatment.

38 Hypothesis 1C (exploratory): Normalization of nutrition-dependent hormonal concentrations [insulin-like growth  
39 factor-I (IGF-I), leptin, adiponectin] during hospitalization will directly correlate with osteoblast function and  
40 bone formation as measured by biomarkers of bone turnover and <sup>18</sup>F-PET.

41  
42 **Specific Aim 2: To conduct a randomized, controlled trial to determine the differential long-term effects**  
43 **of LMMS on trabecular and cortical bone in ambulatory adolescents with AN.**

44 Hypothesis 2A: vBMD, as measured by pQCT at a weight-bearing site (tibia), will be greater in ambulatory  
45 adolescents with AN randomized to receive daily LMMS for 6 months compared to adolescents with AN  
46 randomized to placebo, and will be greater than baseline values, controlling for weight gain and exercise level.

47 Hypothesis 2B: Cumulative exposure to LMMS (number of total minutes spent on the platform during the trial)  
48 will be positively correlated with absolute and percentage change in vBMD of both the tibia and spine among  
49 all participants randomized to the active treatment arm.

50 **Specific Aim 3: To determine the long-term effects of LMMS on biochemical indices of bone**  
51 **remodeling in ambulatory adolescents with AN.**

52 Hypothesis 3A: LMMS will result in anabolic skeletal effects, as evidenced by increases in biochemical markers  
53 of bone formation [bone specific alkaline phosphatase (BSAP), osteocalcin (OC)] and a decrease in bone  
54 resorption [serum C-terminal telopeptide of type 1 collagen (CTX)] measured at repeated intervals over 6  
55 months in the subjects receiving LMMS, both relative to baseline and as compared to the control group.

56 Hypothesis 3B (exploratory): Changes in biochemical indices of bone remodeling will correlate with changes in  
57 hormonal concentrations (IGF-I, leptin, adiponectin) observed over the 6 months of LMMS intervention.

58  
59 **B. Background and Significance**

60 AN is a chronic illness with significant morbidity and mortality, including a major impact on bone mass during  
61 adolescence. The proposed study focuses on the short-term and long-term effect of a novel, non-  
62 pharmacologic intervention on bone markers and the prevention of deleterious changes in bone density and  
63 strength in adolescents with AN.

64  
65 **B1. Significance of the problem of bone loss and anorexia nervosa**

66 AN, a disorder characterized by malnutrition, intense fear of weight gain, and amenorrhea, is becoming  
67 increasingly prevalent. The onset of this disorder tends to occur during adolescence, when bone mineral  
68 accretion rates should be at their highest. Two clinical features of AN, estrogen deficiency and loss of body  
69 weight, are important risk factors for osteoporosis. Multiple studies have demonstrated that early bone loss is a  
70 frequent complication of AN, occurring in over half of patients<sup>5,6</sup>. The mechanisms of bone loss observed in  
71 adolescent girls with AN are complex. Identified factors that may affect attainment of peak bone mass include:  
72 low estrogen and androgen levels, decreased levels of IGF-I, increased cortisol levels, poor nutrition, family  
73 history of osteoporosis, and the low body mass that is characteristic of AN. It is likely a combination of these  
74 and other factors that leads to low BMD in young women with this disease.

75  
76 In patients with AN, bone remodeling differs from that observed in other estrogen-deficient states. The  
77 pathogenesis of bone loss in adolescents with AN is characterized by both impaired bone formation and  
78 accelerated bone resorption<sup>10-12</sup>. These abnormalities improve with refeeding; weight gain is associated with  
79 normalization of both elevated bone resorption and depressed bone formation<sup>13</sup>. BMD is also adversely  
80 affected. Studies have shown a significant reduction in bone mass in both trabecular and cortical bone  
81 compared with age-matched controls, with the lumbar spine (a site consisting primarily of trabecular bone)  
82 appearing to be particularly vulnerable<sup>11,14,15</sup>. BMD in adolescents with AN is correlated with BMI, age at onset  
83 of illness, age at menarche, lean body mass, and duration of illness<sup>10,14,16-19</sup>. Of significant concern is the fact  
84 that the decreased BMD that is observed often does not return to pre-illness levels even years after recovery  
85 and weight restoration<sup>11,20-24</sup>. Thus, the bone loss seen in this disease can represent an irreversible medical  
86 complication. The implications for life-long skeletal health are substantial; patients with AN have a seven-fold  
87 increased incidence of spontaneous fractures, which may occur at multiple sites<sup>20</sup>. Therefore, there is a  
88 pressing need to develop better methods for the prevention of bone loss before it occurs.

89  
90 **B2. Current strategies for the prevention and treatment of bone loss in adolescents with AN**

91 The treatment of low BMD in adolescents with AN is an area of controversy and fervent research. To date,  
92 there appear to be few consistently effective strategies for either prevention or treatment of bone loss in this  
93 population. Several prospective studies have investigated the efficacy of estrogen therapy as a possible  
94 intervention. A one-year prospective study in adolescents with AN randomized patients to estrogen-progestin  
95 or placebo; no difference between groups in absolute BMD or net change in BMD at the lumbar spine or the  
96 femoral neck was noted<sup>25</sup>. Similar randomized, prospective investigations have found similar results<sup>12,26,27</sup>.  
97 These data were summarized in a recent large meta-analysis that concluded that evidence of a positive effect  
98 of estrogen HRT as a sole therapy was limited in AN<sup>28</sup>.

99  
100 Dehydroepiandrosterone (DHEA) is another hormonal modality which has been studied by our group for the  
101 prevention of bone loss. DHEA is a precursor of both estrogens and androgens, and is often decreased in  
102 patients with AN. Short-term treatment with oral DHEA has been shown to decrease markers of bone  
103 resorption and increase markers of bone turnover in adolescents with AN<sup>29</sup>. DHEA therapy has also been

104 compared to combination hormonal therapy (20 mcg ethinyl estradiol and 0.1 mg levonorgestrel)<sup>26</sup>. After one  
105 year of treatment, both groups exhibited significantly reduced markers of bone resorption, and the DHEA group  
106 also showed increased markers of bone formation. During treatment, maintenance of both hip and spinal BMD  
107 was seen, but there was no significant increase after accounting for weight gain. In addition, young women  
108 receiving DHEA treatment also showed improvement in psychological measures<sup>26</sup>.

109  
110 Researchers have also investigated the effect of IGF-I on bone turnover markers and BMD in young women  
111 with AN. IGF-I stimulates osteoblast function and collagen synthesis, and is abnormally low in patients with  
112 AN<sup>10,15</sup>. Short-term treatment for 6 days with recombinant human IGF-I (rhIGF-I) in young women with AN led  
113 to a dose-dependent increase in markers of bone turnover<sup>30</sup>. Subsequently, the authors conducted a  
114 randomized trial of longer duration to determine whether rhIGF-I would lead to increases in bone density in  
115 women with AN<sup>27</sup>. Sixty women, ages 18-38 years, with low baseline BMI and spine BMD T-scores were  
116 enrolled. Participants were randomized to one of four groups: rhIGF-I and OCP (35 mcg ethinyl estradiol, 0.4  
117 mg norethindrone), rhIGF-I alone, OCP alone, or placebo. Spinal BMD increased in all women receiving  
118 rhIGF-I as compared to those not receiving this agent. No change in spinal BMD was seen in patients  
119 receiving OCPs vs. non-OCP users. The greatest increase in bone density was observed in the combined  
120 treatment group (rhIGF-I and OCP) compared to those receiving placebo (1.8% ± 0.8% vs. -1.0% ± 1.3%,  
121 p<0.05). While women treated with rhIGF-I demonstrated beneficial changes in BMD, anti-resorptive treatment  
122 with OCPs alone was not sufficient to improve BMD in these undernourished women, but appeared to augment  
123 the effects of rhIGF-I when used in combination<sup>27</sup>. Proof of concept regarding the beneficial skeletal effects of  
124 combined antiresorptive and anabolic therapies in AN was suggested by these data. Further research is  
125 needed regarding patient acceptance of a subcutaneous medication, and the administration of this agent to a  
126 young adolescent age group.

127  
128 Preliminary research has investigated the use of bisphosphonates for treatment of bone loss and maintenance  
129 of BMD in adolescents with AN. Bisphosphonates are inhibitors of osteoclast-mediated bone resorption, and  
130 have been used to treat the low bone mass associated with cerebral palsy, osteogenesis imperfecta, and  
131 steroid use<sup>31-33</sup>. However, the bone loss suffered by patients with AN is related not only to accelerated bone  
132 resorption, but also to impaired bone formation. In a randomized, double-blind, placebo-controlled trial of 32  
133 adolescents with AN, alendronate 10 mg daily was tested. After one year of treatment, no between-group  
134 difference in BMD was noted at the lumbar spine or femoral neck between treatment and placebo groups<sup>34</sup>.  
135 Risedronate has also been evaluated as a therapeutic agent. In a recent study, 10 women with AN and  
136 baseline osteopenia received risedronate 5 mg daily for 9 months<sup>35</sup>. Bone density increased significantly in  
137 patients receiving this agent as compared to control subjects, despite a lack of significant weight gain.  
138 However, the effect of bisphosphonate use in the reproductive age group is unknown, and long-term side  
139 effects of these agents have not been well-established. Further clinical studies are needed.

140  
141 Although the studies of these pharmacological therapies have increased understanding of the pathophysiology  
142 of bone loss in AN, other nonpharmacologic therapies deserve critical assessment. Weight-bearing exercise  
143 that does not compromise the goal of weight gain is a promising, yet unexplored, treatment that may protect  
144 against bone loss in patients with AN. To date, the incorporation of exercise into AN treatment programs is  
145 controversial, and has not been extensively studied. LMMS may be the critical intervention which will provide a  
146 weight-bearing stimulus for skeletal formation, while minimizing risks associated with increased activity levels.

### 147 **B3. Immobilization and the skeleton**

148  
149 Most patients with AN are placed on bed rest during hospitalization, and once discharged, exercise is  
150 prohibited or significantly restricted. However, prolonged abstinence from exercise may contribute to bone loss,  
151 increased risk of cardiac symptoms, and decreased compliance with the treatment program. Previous studies  
152 have examined the relationship between immobility and bone health in other populations. Skeletal unloading,  
153 such as occurs with bed rest, leads to reductions in the mechanical forces applied to bones. During bed rest,  
154 gravitational forces on the skeleton are 83% less than in the upright, loaded position<sup>36</sup>. It has been estimated  
155 that strict bed rest leads to bone loss of approximately 1-2% per month<sup>9</sup>. Decreased mechanical usage

depresses longitudinal growth, and stimulates bone remodeling-dependent bone loss<sup>37</sup>. The mechanism of this bone loss appears to be both a decrease in the bone formation rate, and a concurrent increase in the bone resorption rate<sup>38</sup>. Trebacz used rat models to show that during even transient immobilization, bone resorption and formation are uncoupled<sup>39</sup>. Osteoclastic activity increases post-immobilization, with a peak at 3 to 5 days, and is likely the major contributor to the loss of trabeculae during this rapid phase<sup>40</sup>. In healthy young adults, 20 days of bed rest led to both increased bone resorption and loss of BMD in lumbar and metacarpal bones<sup>41</sup>. Populations at highest risk for bone loss may be particularly vulnerable to changes induced by immobility. In a study comparing bone loss following ovariectomy with that following immobilization, the greatest loss of trabeculae occurred when ovariectomy was combined with immobilization<sup>42</sup>. This finding suggested that mechanical weight-bearing provided some protection against loss of bone through hormonal influences. Given that our adolescents with AN all have hypothalamic suppression, menstrual irregularity, and extremely low estrogen concentrations, the additive effect of bed rest may be particularly deleterious. Even short-term immobilization appears to be harmful; in healthy humans, biochemical parameters of bone turnover increase after only 7-10 days of bed rest<sup>8,43</sup>. Osteoclast activity appears to increase quickly; by the 2<sup>nd</sup> day of immobility, markers of bone resorption profoundly increased from baseline in healthy men placed on 6 days of head-down bed rest<sup>9</sup>. Our pilot data also suggest a rapid disruption of the balance of bone turnover following 5 days of bed rest for adolescents with AN (Section C1).

An additional concern is that resumption of previous mechanical loading does not seem enough to stop disuse-induced bone changes. In fact, following immobilization in rats, significant worsening of bone mechanical properties occurred during 4 weeks of full remobilization without set exercise<sup>39</sup>. In contrast, after 16 weeks of forelimb immobilization, young adult dogs remobilized with exercise three times/week showed complete recovery of bone mechanical properties<sup>44</sup>. Other animal studies corroborate the finding that exercise and remobilization are more effective than remobilization alone for restoring the normal bone trabecular network<sup>45,46</sup>. These collective results indicate that to prevent ongoing skeletal aberrations, the intensity of the remobilization activity must be greater than that of normal activity. Following hospitalization, exercise is prohibited for the majority of patients with AN until weight goals are reached and cardiac stability is assured; these activity restrictions are frequently long-term given the recurrent periods of relapse that our common in this population<sup>47</sup>. Based on these data, identifying a non-aerobic, weight-bearing intervention to protect skeletal health during this recovery time is crucial.

#### **B4. Effect of mechanical stimulation on bone**

Weight-bearing and physical activity are important mechanical stimuli for bone growth and bone remodeling, and reduce the prevalence of osteoporosis-related fractures<sup>48</sup>. Currently, exercise is promoted as a strategy to prevent and/or treat bone loss in postmenopausal women. The positive effects of exercise on bone are explained by Frost's 'mechanostat hypothesis', which proposes that bone strength is regulated by modeling and remodeling processes depending on forces acting on bones<sup>49-51</sup>. Thereby, bone is adapted to the tissue strain due to biomechanical forces. There is a positive relationship between physical activity and bone mineralization; bone mineral content (BMC) is higher with higher amounts of activity<sup>52</sup>. Previous studies have documented that dynamic forces, rather than static loads, are the greatest stimuli for osteogenesis<sup>53</sup>. In *ex vivo* work, cyclical mechanical stimulation, corresponding to physiological jumping for 5 minutes daily, resulted in increased evidence of bone formation, reduced osteocyte apoptosis, and improved osteocyte viability in human trabecular bone samples<sup>54</sup>. Investigations conducted in pediatric populations support these findings<sup>55-58</sup>. Even a brief (12 minute), high-impact weight-bearing exercise session conducted three times/week has considerable influence on BMD in early pubertal girls<sup>57,58</sup>. In adolescent females, resistance training led to an increase in femoral neck BMD in the intervention group<sup>59</sup>. Physical activity likely leads to improved bone mass in two ways. Directly, weight-loading generates compressive forces that stimulate bone accrual. Additionally, activity also indirectly promotes bone acquisition by increasing muscle mass and, therefore, increasing the forces generated on bones where muscles attach<sup>48</sup>. Thus, greater lean body mass would be expected to correlate with greater bone strength, consistent with our previous findings in young women with AN, and previous work that has examined the "muscle-bone unit" in adolescent and young adult populations<sup>60,61</sup>.

The role of physical activity in AN-related bone loss is controversial. Investigators have shown no benefit of exercise<sup>5,15,62</sup>; harmful effects of exercise<sup>63</sup>; and protective effects of exercise<sup>10,64,65</sup>. The majority of the data

210 were obtained from adult studies, and are unlikely to be generalizable to young adolescents with AN. Few  
211 studies have examined the safety of prescribed exercise for AN patients. Thien et al. showed that a guided  
212 exercise program increased compliance with treatment, and did not reduce short-term gain of BMI<sup>66</sup>. To date,  
213 no randomized control trials of the effects of an exercise intervention on bone health in patients with AN have  
214 been carried out, due to the need to prioritize weight gain and cardiac health concerns in these patients. Our  
215 proposed LMMS intervention offers a safe, non-aerobic alternative to traditional weight-bearing exercise that  
216 will not be associated with increased metabolic demands, and will have no known cardiac risk.

## 217 **B5. High frequency, low magnitude mechanical signals (LMMS)**

218 A common perception of the skeletal response to exercise is that the mechanical load must be great to  
219 increase bone mass. However, extremely low-level (<<100 microstatin) high frequency (10-90Hz) strains on  
220 bone mass, similar to those caused by muscle contractions during postural control, have recently been  
221 demonstrated to be anabolic to bone tissue<sup>67</sup>. Preliminary data in animal models and human subjects has  
222 demonstrated that high frequency LMMS delivered by means of a vibrating platform can inhibit bone loss and  
223 preserve BMD in at-risk populations<sup>68-73</sup>. Initial studies were conducted in adult sheep that were vibrated for 20  
224 minutes/day, 5 days/week<sup>74</sup>. Using QCT, the investigators observed a 34.2% increase in trabecular density of  
225 the femur in the mechanically stimulated sheep compared with control sheep. Histomorphometric analysis  
226 revealed that this effect was primarily achieved by increases in trabecular number and trabecular bone volume.  
227 The trabecular bone in the stimulated animals was 12% stiffer and 27% stronger, thus indicating that the  
228 stimulus not only improved the quantity of the bone, but also bone quality<sup>74</sup>. No differences were seen at the  
229 radius, indicating that the anabolic effect was specific to the skeletal region that was subjected to the  
230 mechanical signal. Short-term investigations in rats demonstrated that LMMS 10/minutes daily successfully  
231 inhibited disuse osteopenia, whereas 10 minutes/day of normal weight-bearing activity failed to curb this loss<sup>68</sup>.  
232 The mechanism by which LMMS causes these positive changes in the musculoskeletal system is unknown.

233  
234  
235 The efficacy of LMMS has also been demonstrated in human populations. Rubin et al. randomized 70  
236 postmenopausal women to receive LMMS (0.2g, 30Hz) or placebo for 12 months<sup>73</sup>. After 12 months, the  
237 placebo group had a 3.3% loss of BMD at the lumbar spine and 2.9% loss of BMD in the trochanteric region of  
238 the femur. Over the same time period, the experimental group exhibited a loss of BMD at the spine of only  
239 0.8% (a 2.5% benefit of treatment); BMD was gained at the trochanter (3.5% benefit of treatment). Even larger  
240 benefits were seen in the women with lowest body weight (<65kg) who were considered to be at greatest risk  
241 for skeletal deficits. However, the hope is that use of LMMS not only treats existing skeletal fragility, but also  
242 reduces the risk of osteoporosis and fractures later in life. Accordingly, studies have also been conducted in  
243 pediatric and young adult populations. A heterogeneous group of 20 pre- and post-pubertal children with  
244 cerebral palsy were randomized to LMMS intervention (0.3g, 90Hz) or placebo (10 minutes/day, 5 days/week)  
245 for 6 months<sup>69</sup>. Pre- and post-trial proximal tibial and spinal (L2) vBMD was measured by QCT. Over the 6-  
246 month trial, the mean change in tibial vBMD in children who stood on active devices was +6.3%, while children  
247 who stood on placebo devices had a -11.9% change in tibial vBMD. At the spine, the net benefit of treatment  
248 as compared with placebo was +6.7 mg/mL. Gilsanz et al. investigated whether brief, daily exposure to  
249 extremely low-level mechanical stimuli was anabolic to musculoskeletal development in young females with  
250 existing low BMD and a history of fracture<sup>72</sup>. Subjects were assigned to either a placebo or intervention group,  
251 and instructed to stand on the platform for 10 minutes/day for 12 months. Measurements of bone volume and  
252 density were obtained by QCT of the lumbar spine at baseline and 12 months. Subjects who used the platform  
253 for at least 2 minutes/day had increased spinal trabecular vBMD (3.9% increase) and cross-sectional area of  
254 the femur (2.9% increase) over control subjects and poor compliers. Additionally, intervention subjects had  
255 approximately a 5% increase in the cross-sectional area of paraspinous and thigh musculature compared to  
256 the control group. No significant adverse events were reported.

257  
258 To deliver the LMMS, a small platform has been designed to deliver foot-based whole body vibration via a  
259 vertical, sinusoidal acceleration. The peak acceleration is 0.3g (1g=Earth's gravitational field); frequency is 30  
260 Hz. Based on previous research, this dose appears to safely maximize the intervention's benefit while  
261 minimizing the amount of time required to use the device<sup>72,75</sup>. This acceleration is well below International  
262 Organization for Standardization and Occupational Safety and Health Administration recommendations for  
263 human limits of vibration exposure<sup>76</sup>. At these levels, standing humans could be safely exposed for up to 4

hours per day. Each device is equipped with a built-in electronic monitoring system that automatically records the duration during which the device is used each day and can be helpful in monitoring a subject's adherence. In studies conducted in both pre- and post-menopausal women, no adverse events were reported<sup>69,72,73</sup>.

#### **B6. Possible mediators of the effect of malnutrition and immobilization on bone**

Although weight gain appears to reverse abnormal alterations of bone turnover in patients with AN<sup>13</sup>, both the acute mechanisms behind these changes and the chronology of bone remodeling events remain unclear. Accompanying the malnutrition associated with AN are significant changes in the normal hormonal milieu, including estrogen deficiency, decreased androgens, increased cortisol, and growth hormone resistance. Some combination of these abnormalities is likely responsible for the early bone loss seen in these patients<sup>5-7</sup>.

One potential mechanism to explain the effect of refeeding and immobility on bone turnover is acute changes in IGF-I concentrations. IGF-I acts upon cells of osteoblast lineage to stimulate collagen synthesis, and to increase proliferation and differentiation of osteoblast precursor cells<sup>77</sup>. The regulation of IGF-I is nutrition-dependent; circulating levels of IGF-I decline during acute fasting, and increase with nutritional repletion<sup>78-82</sup>. After only 4 days of fasting, IGF-I concentrations decrease in parallel with a reduction in indices of both bone formation and resorption<sup>83</sup>. Other researchers have also shown the association between diminished IGF-I concentrations, states of low bone turnover, and significant bone loss<sup>17,80</sup>. Chronically malnourished patients, such as women with AN, also have much lower serum IGF-I and IGF-BP-3 concentrations than healthy subjects<sup>10</sup>; these proteins show a strong correlation with BMI<sup>82,84</sup>. After short-term refeeding or weight recovery, IGF-I levels increase, and have been shown to be similar to a normal comparison group<sup>13,78,84</sup>.

IGF-I also appears to play an important role in bone turnover. To examine whether IGF-I was, in fact, an important mediator of the effect of fasting on bone turnover, subcutaneous rhIGF-I was administered to a small group of healthy females during a 10-day fast<sup>81</sup>. The group treated with rhIGF-I had a significant increase in markers of bone formation while continuing to fast. Control subjects showed a persistent suppression of bone formation during the entire fasting period. There was no difference in bone resorption markers between the two groups. The authors concluded that rhIGF-I administration disrupted the balance of bone turnover, and was a potent, selective osteoblast stimulator in states of acute undernutrition<sup>81</sup>. These findings contrasted with those from studies of postmenopausal women, in whom indices of bone formation and resorption both increased in response to 6 days of rhIGF-I administration<sup>85</sup>. It is possible that the estrogen deficient state of the postmenopausal subjects potentiated the effects of IGF-I to stimulate osteoclasts and enhance bone resorption<sup>86</sup>. Additionally, skeletal unloading appears to induce resistance to IGF-I with respect to bone formation, by inhibiting the activation of IGF-I signaling pathways, resulting in decreased proliferation of osteoblasts and their precursors<sup>87</sup>.

Given that BMD is positively associated with body weight, even at non-weightbearing sites, it has also been suggested that a non-mechanical factor such as an adipocyte-derived hormone may modulate BMD<sup>88</sup>. Thus, we will explore the association between the adipocyte-derived hormones leptin and adiponectin with the skeletal assessments obtained in the proposed study. Leptin is involved in the regulation of food intake and energy metabolism. Peripherally, leptin modulates insulin sensitivity; high leptin triggers insulin resistance<sup>89</sup>. This hormone has garnered recent interest because of its possible role in the pathogenesis of bone loss in patients with AN<sup>90</sup>. Women with AN have decreased levels of leptin compared with healthy control subjects<sup>91-93</sup>. Nutritional rehabilitation and weight gain results in increased leptin concentrations<sup>91,94</sup>. Serum leptin levels were strongly correlated with bone formation markers, suggesting that a potential cause-and-effect relationship exists<sup>94</sup>. Leptin has also been shown to be negatively correlated with BMD at the lumbar spine and total body in perimenopausal women<sup>95</sup>. We hypothesize that weight-gain, both short- and long-term, will lead to increased levels of leptin and correlate with increased bone formation biomarkers. Our proposed intervention itself may also affect long-term leptin secretion. Rat studies utilizing LMMS technology demonstrate that adiposity is suppressed in mice randomized to LMMS daily vs. control mice. After 12 weeks, fat volume in the torso of LMMS mice was 27% lower than control mice, independent of differences in body mass or food intake<sup>96</sup>. Circulating levels of leptin were 38% lower in the LMMS group compared to controls<sup>96</sup>. We plan to monitor leptin concentrations every 6 months during the longitudinal phase of the study, to determine whether differences exist between the intervention and control groups.

Adiponectin is a second adipose-derived protein that is involved in energy homeostasis, and lipid and glucose metabolism<sup>97</sup>. Adiponectin production increases during short-term fasting<sup>98</sup>, and rapidly decreases during refeeding<sup>99</sup>. Adiponectin and its receptors are known to be expressed in osteoblasts<sup>100</sup>. Studies show that adiponectin stimulates the proliferation, differentiation, and mineralization of osteoblasts<sup>100-102</sup>. In rat models, adiponectin-adenovirus treatment led to increased trabecular bone mass, decreased number of osteoclasts, and decreased bone resorption markers<sup>103</sup>. Adolescents with AN have higher levels of adiponectin than healthy control subjects, even after controlling for fat mass<sup>90,91,93</sup>. After weight restoration, adiponectin concentrations decline to levels matching those of control subjects<sup>104</sup>. Many investigations have demonstrated that increasing levels of adiponectin are independently associated with decreasing BMD<sup>90,105,106</sup>.

## B7. Skeletal Assessment Tools

Biochemical markers of bone turnover are molecular entities, measured in serum or urine, that offer a dynamic means for the assessment of bone resorption and bone formation. While older markers suffered from both a lack of specificity and large intra-individual variability, the newer markers offer a much more specific, direct, and precise measurement of the bone remodeling process<sup>107</sup>. Clinically, bone biomarkers are useful for measuring response to antiresorptive therapy, and can predict future fracture risk independent of bone density<sup>107,108</sup>. The proposed study will utilize several of the newest biochemical markers to quantify changes in bone turnover that occur as a result of the LMMS intervention. These indirect markers will provide a more immediate view of the effectiveness of our intervention within a short time frame<sup>108</sup>. We will utilize serum rather than urine samples to minimize changes in markers related to ongoing changes in both muscle mass and urinary excretion that may occur with refeeding<sup>13</sup>. Serum BSAP is a tetrameric glycoprotein found on the cell surfaces of osteoblasts. As an indicator of osteoblastic activity, BSAP provides information on bone formation. Serum OC is a small, noncollagenous protein that is predominantly synthesized by mature osteoblasts during bone formation, but is also released into the circulation from the matrix during resorption<sup>109</sup>. OC is a valid marker of bone turnover when resorption and formation are coupled, and is a specific marker of bone formation when formation and resorption are uncoupled<sup>110</sup>. Therefore, OC is truly a marker of bone turnover rather than a specific marker of bone formation. Lastly, we will measure serum CTx. This specific marker of bone resorption offers an advantage over older urine assays of bone resorption because of its increased sensitivity and specificity<sup>110,111</sup>. These measured telopeptide fragments are specific to degradation of mature bone collagen, assuring that the marker reflects the bone resorption process<sup>107</sup>.

<sup>18</sup>F-PET is a non-invasive imaging technique that allows assessment of bone metabolic activity, quantification of bone blood flow, and estimation of osteoblastic activity<sup>112,113</sup>. The <sup>18</sup>F-fluoride radionuclide bone tracer is extracted by bone tissue largely in proportion to bone blood flow, enters and binds to bone tissue, and labels the cells involved in bone turnover<sup>112</sup>. It appears specific for osteoblasts, and thus bone formation<sup>114</sup>. <sup>18</sup>F-PET offers the advantage of quick tracer uptake, allowing scans to be completed within 1 hour of tracer injection, and the ability to perform regional rather than global measurements<sup>113</sup>. We will calculate the signal intensity over a region of interest (spine and hip) using the standard uptake value (SUV), which is the most widely used parameter for quantification of PET studies in practice<sup>115</sup>. This measure represents the tissue activity within a region of interest corrected for the injected activity and for patient weight. Only static PET images, *without* concurrent blood sampling, are required. SUV strongly correlates with dynamic measures of bone metabolism ( $r=0.95$ ), making it an easy-to-obtain surrogate endpoint for dynamic measures<sup>115</sup>.

While the “gold standard” method for measurement of bone turnover is bone biopsy and histomorphology, quantitative <sup>18</sup>F-PET can provide comparable data without an invasive procedure. Studies comparing bone histomorphology analyses show excellent correlation with <sup>18</sup>F-PET results<sup>116,117</sup>, indicating that <sup>18</sup>F-PET is a noninvasive measurement of bone metabolic activity. Use of quantitative <sup>18</sup>F-PET has been demonstrated in many populations<sup>116,118</sup>. In a study of patients with renal osteodystrophy, calculated rate of incorporation of <sup>18</sup>F-fluoride into bone correlated with serum markers of bone turnover, and bone histomorphometry<sup>116</sup>. <sup>18</sup>F-PET will provide direct evidence for regional bone formation, and enable us to test our hypothesis that LMMS will lead to increases in bone formation compared to placebo treatment. Bones with the highest proportion of trabecular (cancellous) bone are at the highest risk for disuse osteoporosis. These areas are also eight times more active than cortical bone, and response to metabolic changes is faster. Just as the skeleton does not show uniform loss of bone during immobilization<sup>40</sup>, we do not anticipate that increases in bone formation

372 induced by LMMS will be equally distributed throughout the skeleton. We anticipate that bone formation will be  
373 enhanced at areas of primarily trabecular bone (e.g., lumbar vertebrae and hip intertrochanteric region). We  
374 will correlate the <sup>18</sup>F-PET data with the biomarkers of bone turnover, which will provide auxiliary evidence to  
375 support our hypothesis.

376  
377 Peripheral QCT (pQCT) also allows for selective measurement of trabecular and cortical vBMD, and the other  
378 cross-sectional geometry measures. Additionally, pQCT minimizes radiation exposure as measurements of  
379 the appendicular skeleton are obtained. pQCT measurements will be obtained at the proximal radius at the  
380 20% site. This location has the most normative data in adults, and growing data are available for pediatric  
381 patients. At the tibia, we will measure the 66% site to obtain information not only about BMD at the diaphysis  
382 but also to quantify muscle mass; this location represents maximal muscular cross-section. We will also  
383 measure the 4% site at both the radius and tibia to obtain information about trabecular bone and skeletal  
384 changes that may occur at the metaphysis. Pediatric reference values for these measurements have been  
385 established by investigators using the same model scanner as in our GCRC. In addition, in a combined  
386 institutional effort, normative data for our site are being collected for use in this and other clinical studies.  
387 Imaging both the tibia (a weight-bearing site) and radius (a non-weight-bearing site) will provide us with a built-  
388 in “control” for the intervention subjects to help us determine whether skeletal changes noted over the course  
389 of the study are, in fact, related to our LMMS intervention.

390  
391 Dual energy x-ray absorptiometry (DXA) has been the most widely used tool for assessment of bone mass in  
392 clinical practice. DXA measures bone in two dimensions, and allows for calculation of areal BMD. Although  
393 DXA measures are highly correlated with bone strength, strength depends on skeletal properties such as  
394 geometry, elasticity, and internal architecture, which are not reflected directly in DXA measurements. While  
395 material strength cannot yet be measured *in vivo* by non-invasive means, geometry can be measured by the  
396 means described above, and may reveal strength deficits not readily evident in conventional BMD or BMC  
397 Additionally, DXA is strongly influenced by bone and body size. However, DXA is the preferred method for  
398 measurements of body composition, and total lean body mass DXA measurements appear to be a reliable  
399 surrogate for skeletal load<sup>119</sup>. Thus, DXA scans of the total body will be obtained to measure ongoing changes  
400 in body composition that occur over the longitudinal study.

#### 401 402 **B7. Summary: Significance of the Proposed Research**

403 In summary, low bone mass is a widespread, chronic source of morbidity for adolescents and young women  
404 with AN. These patients have numerous risk factors for skeletal deficits, including low body weight, poor  
405 nutritional intake, and hormonal deficits. In addition, activity restrictions are commonly imposed on these  
406 patients, both during acute hospital admissions accompanied by bed rest, and intermittently throughout their  
407 outpatient treatment course. This lack of mechanical stimulation is known to be another significant risk factor  
408 for decreased bone mass. To date, pharmacologic treatments aimed at preventing or ameliorating bone loss in  
409 this population have been met with variable results, and are not without side effects. High-frequency LMMS  
410 have been shown to have a substantial positive impact on bone quantity and bone quality in both pediatric and  
411 adult populations, including those most at risk for low BMD. Trabecular bone appears to be particularly  
412 sensitive to the positive benefits of this intervention; this area of high metabolic demand and rapid turnover is a  
413 critical “at risk” anatomic site for adolescents with AN. Additionally, muscular mass was significantly enhanced  
414 in those receiving LMMS treatment. No adverse effects of the intervention have been reported. Given the  
415 substantial benefits to overall bone health and musculoskeletal development, LMMS signals may represent the  
416 answer to the prevention and/or treatment of low bone mass in adolescents with AN: a safe, non-invasive, non-  
417 pharmacologic means to enhance both bone density and bone quality.

#### 418 419 **C. Preliminary Studies**

##### 420 **C1. Effect of Bed Rest on Bone Turnover in Young Women Hospitalized for Anorexia Nervosa:**



421  
422

We recently completed an observational, prospective pilot study to determine the effect of relative immobilization (bed rest) on markers of bone turnover in adolescents and young women during acute hospitalization for medical complications of their eating disorder. We recruited participants age 13-22 years who met DSM-IV diagnostic criteria for AN, including at least 3 months of amenorrhea (n=29). All patients were placed on the CHB standardized eating disorder inpatient protocol, which includes structured refeeding guidelines and protocols for bed rest. We found that markers of bone formation (BSAP) and bone resorption (urine N-telopeptides, NTx) were both acutely suppressed (by Day 3) from baseline measures (Figure 1). However, by discharge (Day 5), an imbalance of bone turnover was seen, with an increase in NTx concentrations from the Day 3 nadir, and continued decline in BSAP levels.

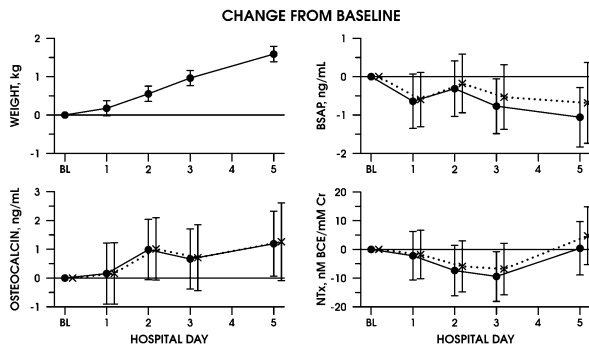

435  
436  
437  
438  
439

While these highly-specific markers reflect both suppressed bone formation (BSAP) and initially suppressed, then increased, resorption (NTx), a marker of the overall state of bone turnover (OC) increased from baseline to discharge, reflecting the high-turnover state provoked by bed rest and refeeding.

440  
441  
442  
443  
444  
445  
446  
447  
448  
449  
450

### C2. Bone Cross-Sectional Geometry in Adolescents and Young Women with Anorexia Nervosa: A Hip Structural Analysis Study<sup>60</sup>:

Our group has examined hip cross sectional geometry via the Hip Structural Analysis (HSA) program in adolescents with AN. Baseline areal BMD measurements of the left total proximal femur were obtained in 85 adolescents with AN and 61 healthy control subjects by DXA. We used the HSA Program to determine BMD, cross-sectional area, and section modulus at the femoral neck and shaft. We found that femoral neck BMD was significantly lower in patients with AN compared to healthy control subjects (-36%, p<0.001); these results were replicated at the femoral shaft (-29%, p<0.001). At both regions, bone cross-sectional area and section modulus were decreased in subjects with AN compared to controls (-11% to -35%, p<0.001). In patients with AN, hip and spine BMD were correlated with cross-sectional area and section modulus at the femoral neck and shaft (r=0.27 to 0.90, p<0.01). While lean body mass was correlated with HSA variables (r=0.48 to 0.58,

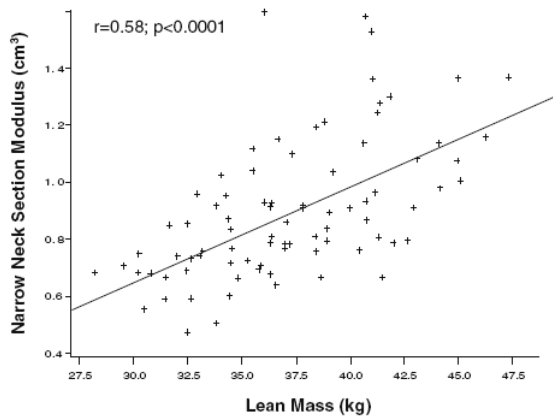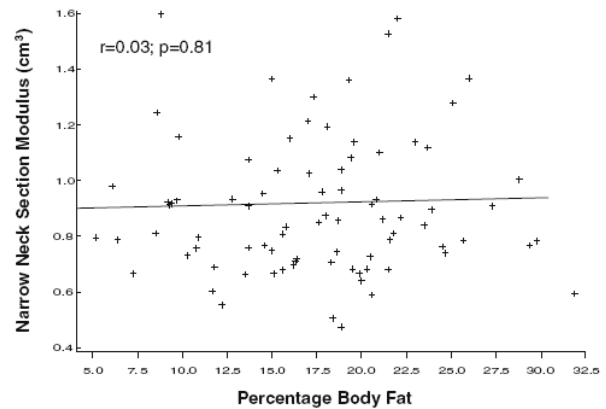

451  
452  
453  
454  
455

p<0.001), body fat percentage was not (Figure 2). The strong correlation between BMD and variables of hip structural geometry suggests that bone strength is compromised in these patients. Our results indicate that measures of bone geometry, as well as bone density, should be taken into account when evaluating bone health in patients with AN.

456  
457  
458  
459  
460  
461

### C3. Skeletal Measurements by Quantitative Ultrasound in Adolescents with Anorexia Nervosa<sup>120</sup>:

In this study, quantitative ultrasound (QUS) was used to evaluate skeletal status in 41 adolescents with anorexia nervosa as compared to 101

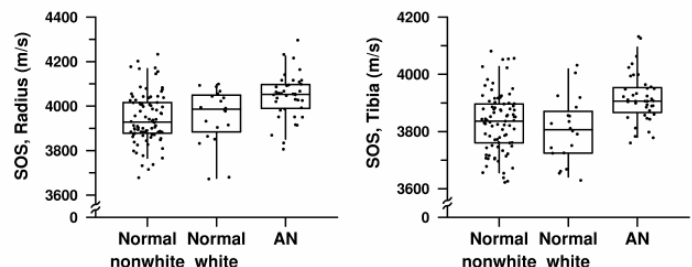

healthy control subjects. Speed of sound (SOS) was measured at the radius and tibia. Participants with AN also underwent areal BMD (aBMD) measurements by DXA of the hip and spine. Bone mineral apparent density (BMAD) was calculated to control for volumetric differences in bone size. We found that subjects with AN had higher mean SOS at the radius ( $4044 \pm 99$  m/s) than control subjects ( $3947 \pm 116$  m/s;  $p < 0.0001$ ) (Figure 3). These results were replicated at the tibia (AN,  $3918 \pm 85$  m/s vs. controls,  $3827 \pm 106$  m/s;  $p < 0.0001$ ). Neither measures of aBMD or BMAD by DXA correlated with SOS. Weight and BMI were negative predictors of tibial, but not radial SOS. AN status remained a significant predictor of SOS after controlling for BMI, age, and race. Lastly, QUS variables did not correlate with DXA measures or anthropometric variables. We concluded that QUS is not an appropriate tool to evaluate bone density in patients with AN.

**C4. Bone Density in Adolescents Treated with a GnRH Agonist for Endometriosis<sup>121</sup>:**

In a recent study, our group examined the bone health of 36 adolescents with endometriosis (ages 13 to 21 years) who were treated with a GnRH agonist and norethindrone acetate as part of routine clinical care. In this patient cohort, the mean BMD Z-score at the total hip was  $-0.24 \pm 1.0$ , with a range of  $-2.4$  to  $1.7$ . At this skeletal site, 17% of subjects had a slightly low BMD Z-score between  $-1.0$  and  $-2.0$  SD, while 6% had a significantly low BMD Z-score  $\leq -2.0$  SD. In comparison, the mean BMD Z-score at the lumbar spine was  $-0.55 \pm 1.1$ , with a range of  $-2.8$  to  $1.4$ . At the spine, 31% of subjects had a BMD Z-score between  $-1.0$  and  $-2.0$  SD, while 9% had a Z-score  $\leq -2.0$  SD. Thus, while BMD at the hip was normal in the majority of the adolescents, almost 1/3 of patients demonstrated significant skeletal deficits at the lumbar spine. There was no correlation noted between duration of therapy with the GnRH agonist plus add-back and BMD at the hip or spine.

**D. Research Design and Methods**

**D1. Study Design**

We will conduct a prospective, double-blind, randomized clinical trial of a low-frequency mechanical stimulation intervention to: Aim 1) prevent an imbalance of bone turnover in adolescents hospitalized for AN; and Aim 2) determine if mechanical stimulation is an effective long-term intervention for the prevention of skeletal deficits over a 6-month period in adolescents and young women with AN.

**D2. Recruitment of the Study Sample**

During the first phase of the study (Years 1-3), we will recruit and enroll 60 young women hospitalized on the Adolescent Medicine service at CHB for medical complications of AN (Figure 4).

**Figure 4: Phase 1, Study Overview**

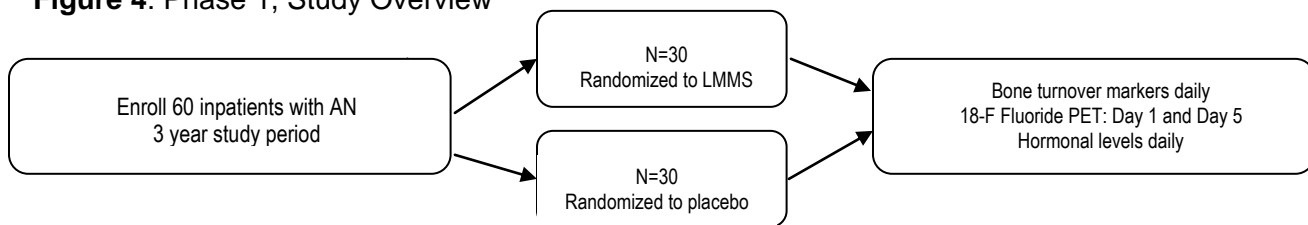

During the second study phase (Years 2-5), we will recruit 50 patients with AN to participate in an outpatient, longitudinal study of mechanical stimulation on skeletal health (Figure 5). An additional 10 patients with AN will be recruited for an outpatient sub-study targeted at obtaining compliance data during the first phase of the study (Figure 5a).

**Figure 5: Phase 2, Study Overview**

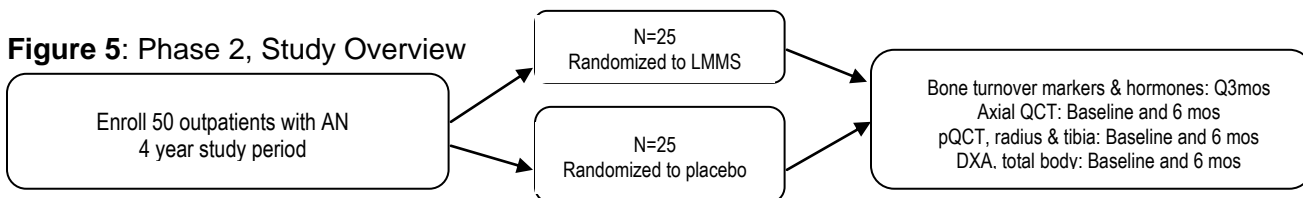

514 **Figure 5a: Study Overview, Short-Term Compliance Study**

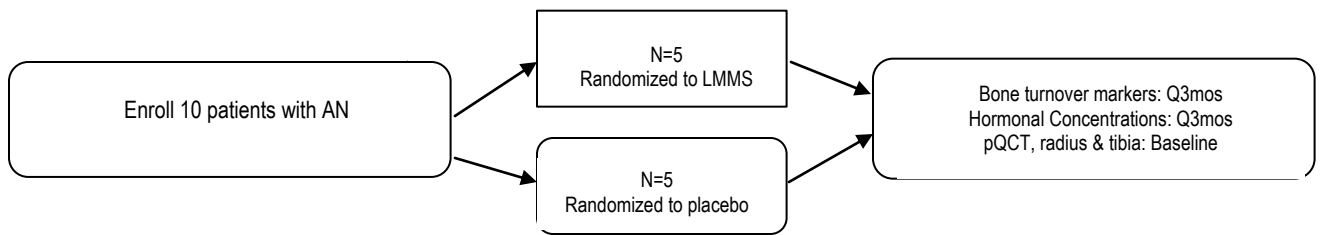

524 **D3. Inclusion and Exclusion Criteria**

525 *D3a: Phase 1 (Inpatient Study)*

526 Inclusion Criteria

- 527
- 528
- 529
- 530
- 531
- 532
- 533
- 534
- Age 13-22 years, at least two years post-menarche
  - Patient exhibits disordered eating, distorted body image, and fear of weight gain.
  - Patient has a BMI of less than 20.0 kg/m<sup>2</sup>
  - Female gender
  - English-speaking
  - Medical admission to the Adolescent Medicine service at Children's Hospital Boston for medical complications of anorexia nervosa, and placement on the Children's Hospital Boston Eating Disorders Clinical Practice Guideline

535

536 Exclusion Criteria

- 537
- 538
- 539
- 540
- 541
- 542
- 543
- 544
- 545
- 546
- Concomitant chronic diseases which affect bone health, such as cystic fibrosis, inflammatory bowel disease, celiac disease, renal disease, or diabetes mellitus
  - Use of medications known to affect bone metabolism in the last 3 months, such as:
    - Glucocorticoid therapy (including inhaled steroids)
    - Anticonvulsants
    - Combined estrogen/progestin contraceptive agents (oral contraceptive pills)
  - Depot medroxyprogesterone (Depo-Provera) use in the last 12 months
  - Current pregnancy

547

548 *D3b: Phase 2 (Outpatient Study)*

549 Inclusion Criteria

- 550
- 551
- 552
- 553
- 554
- Age 11-25 years
  - Patient exhibits disordered eating, distorted body image, and fear of weight gain.
  - Patient has a BMI of less than 20.0 kg/m<sup>2</sup>
  - Female gender
  - English-speaking

555

556 Exclusion Criteria

- 557
- 558
- 559
- 560
- 561
- 562
- Concomitant chronic diseases which affect bone health, such as cystic fibrosis, inflammatory bowel disease, celiac disease, renal disease, or diabetes mellitus
  - Use of medications known to affect bone metabolism in the last 3 months, such as:
    - Glucocorticoid therapy (including inhaled steroids)
    - Anticonvulsants

- 563                   ○ Combined estrogen/progestin contraceptive agents (oral contraceptive  
564                   pills)  
565                   • Depot medroxyprogesterone (Depo-Provera) use in the last 12 months  
566                   • Current pregnancy  
567

#### 568 **D4. Primary Exposure**

569 The primary exposure will be use of a mechanical vibrating plate, the Juvent 1000  
570 Dynamic Motion Therapy platform (FDA regulation 21 CFR 890.5380; Juvent Medical,  
571 Inc., Somerset, NJ) which provides high frequency LMMS (Image shown in Appendix D).  
572 During Phase 1, participants will be randomized to either the vibrating plate group (n=30)  
573 or to a placebo plate group (n=30). The active plate oscillates between 32-37 Hz, and is  
574 designed to create peak-to-peak accelerations of 0.3g, a dose chosen to maximize  
575 safety, efficacy, and compliance<sup>69,72-75</sup>. The placebo plate is identical in external  
576 appearance to the vibrating plate. It emits a high-frequency tone, identical to the noise  
577 produced by the active plate, but does not vibrate at any clinically significant frequency.  
578 Participants will stand on their assigned plate (vibrating or placebo) for 10 minutes daily  
579 for 5 days of hospitalization. Both plates will be equipped with a card reader to “log in”  
580 each participant’s daily use of the plate, and keep track of total minutes of usage per  
581 subject.  
582

583 During Phase 2, participants will be randomized to either treatment with the LMMS  
584 intervention or placebo plate. Participants will be sent home with a vibrating (0.3g, 32-37  
585 Hz) or placebo plate, and instructed to stand on the platform for 10 minutes/day for 6  
586 months. Each plate is equipped with a monitor that tracks compliance/use of the plate,  
587 and prevents over-use of the device (i.e. the plate will not vibrate for more than the  
588 assigned time daily). At this intensity level, the motion of the active platform is barely  
589 discernible. Subject *compliance* will be assessed by an electronic monitor integrated  
590 within the device, which tabulates time, duration, and date of each treatment. After the  
591 10 minute treatment period, the device shuts off automatically. If the subject interrupts  
592 any treatment period, the disruption is detected by the plate through a surface pressure  
593 switch. The device then emits an audible warning, and pauses until the subject returns. If  
594 the subject does not return within 10 minutes, the device will record the time activated,  
595 and shut off.  
596

#### 597 **D5. Outcome Measures**

598 The complete schedule of data collection is given in Section D7e (Phase 1) and Section  
599 D8e (Phase 2).  
600

601 Specific Aim 1 is to determine the effect that LMMS during a period of relative  
602 immobilization has on bone turnover. The primary outcome measure for Phase 1 is  
603 SUV, a quantitative measurement of bone formation which will be obtained by <sup>18</sup>F-PET of  
604 the axial skeleton at baseline (Day 1) and Day 5 of hospitalization. This measurement  
605 will allow us to determine whether differences in areas and amounts of bone formation  
606 exist between those inpatients randomized to treatment with LMMS vs. placebo.  
607 Secondary outcomes for Phase 1 include biomarkers of bone formation (BSAP, OC) and  
608 a marker of bone resorption (serum CTx). Hormonal concentrations will also be  
609 measured, including IGF-I and leptin. Anthropometric measurements will be obtained  
610 daily.  
611

612 Specific Aim 2 is to determine the effect that longer-term LMMS have on skeletal health  
613 in adolescents with AN, over a one year period. The primary outcome for this aim is

614 trabecular vBMD as measured by pQCT of the tibia at baseline and 6 months. Specific  
615 Aim 3 is to determine the effect of LMMS on biomarkers of bone turnover over one year;  
616 primary outcomes are BSAP, OC, and serum CTx measured every 3 months. Secondary  
617 outcomes for Phase 2 total body DXA scans (for measurement of body composition  
618 (baseline and 6 months), anthropometric measurements, hormonal concentrations, and  
619 measures of physical activity.

620

#### 621 **D6. Covariates**

622 Many factors may confound the relationship between AN, exercise and bone health.  
623 These include: age, BMI; dietary intake of calcium and vitamin D; duration of illness;  
624 duration of amenorrhea; previous physical activity level; smoking status; family history of  
625 osteoporosis; percentage ideal body weight; and body fat. Accordingly, these variables  
626 will be collected and accounted for in our data analyses (D7e and D8e).

627

#### 628 **D7. Logistical Issues and Data Collection: Phase 1**

##### 629 *D7a. Patient Enrollment*

630 A member of the study research team will be available via pager at all times, and will be  
631 contacted by the clinical care team when an adolescent with AN is admitted to the  
632 medical service at CHB. The research team member will confirm patient eligibility for  
633 possible participation in the inpatient study. Once the inclusion criteria have been  
634 confirmed, we will obtain participant consent or participant assent/parental consent (if  
635 the subject is a minor), and begin with the randomization process and study procedures.  
636 Subjects will be randomized by the study coordinator by use of randomization  
637 envelopes. Study subjects and the personnel measuring our objective study outcomes  
638 (i.e., laboratory technicians, nuclear medicine radiologist) will both be blinded as to  
639 treatment assignment. Participation in the study will not interfere with the patient's  
640 clinical care; advancement of nutrition and length of hospital stay will be determined  
641 solely by the clinical care team. This approach was utilized for our pilot study (C1), and  
642 was found to work well. The study team will keep a confidential recruitment log of the  
643 names and medical record numbers of all patients approached for study participation.  
644 This log will prevent the enrollment of the same subject on more than one occasion.  
645 Given the short-term, inpatient nature of Phase 1, we do not anticipate problems with  
646 subject adherence. Weekly reminder emails (Appendix A) will be sent to the on-call  
647 clinical team to facilitate subject identification and recruitment.

648

##### 649 *D6b. Laboratory Measurements*

650 On the morning of Day 1 (the subjects' first morning in the hospital), we will measure  
651 markers of bone formation [serum OC and BSAP] and bone resorption [serum CTx].  
652 Fasting samples will be obtained between 8-10AM, to account for changes that may  
653 occur with these markers secondary to feeding and diurnal variation<sup>13,123</sup>. Bone  
654 biomarkers will be repeated daily for 5 days. We hypothesize that the LMMS  
655 intervention will correct the imbalance between bone formation and resorption seen in  
656 our pilot study. Measurement of serum 25-hydroxyvitamin D [25(OH)D] and parathyroid  
657 hormone (PTH) will also be obtained at baseline to rule-out an underlying cause of  
658 abnormal bone metabolism that may alter bone turnover. Hormonal concentrations will  
659 be determined at intervals as outlined below; these will allow us to explore potential  
660 endocrine mediators of the effect between refeeding, LMMS, and bone turnover.  
661 Samples will be processed in the CHB CTSU, and stored at -80°C. Measurement  
662 techniques are described below.

663

664

| Test Name   | Analysis Method              | Laboratory      | Frequency       | Intra-Assay Precision |
|-------------|------------------------------|-----------------|-----------------|-----------------------|
| BSAP        | Chemiluminescent immunoassay | HCCL or MGH CLR | Daily           | 1.5-2.6%              |
| CTx         | ELISA                        | HCCL or MGH CLR | Daily           | 5.2-6.8%              |
| Osteocalcin | ELISA                        | HCCL or MGH CLR | Daily           | 5.5-5.7%              |
| PTH         | Chemiluminescent immunoassay | CHB             | Baseline        | 6.2%                  |
| 25(OH)D     | Chemiluminescent immunoassay | CHB             | Baseline        | 7.3%                  |
| Insulin     | Chemiluminescent immunoassay | HCCL or MGH CLR | Baseline, Day 5 | 2.0-4.2%              |
| IGF-I       | EIA                          | HCCL or MGH CLR | Daily           | 6.6-9.7%              |
| Cortisol    | Chemiluminescent immunoassay | HCCL or MGH CLR | Baseline, Day 5 | 4.4-6.7%              |
| Adiponectin | EIA                          | HCCL or MGH CLR | Daily           | 5.0-5.4%              |
| Leptin      | RIA                          | HCCL or MGH CLR | Baseline, Day 5 | 5.2-7.5%              |

665 BSAP: bone specific alkaline phosphatase; CTx: serum C-terminal telopeptide of type 1 collagen;  
666 PTH: parathyroid hormone; 25(OH)D: 25-hydroxyvitamin D; IGF-I: insulin-like growth factor-I  
667

668

669 *D7c. Skeletal Assessments*

670 All study subjects will undergo <sup>18</sup>F-PET scan of the axial skeleton (spine, hips, pelvis) at  
671 baseline and Day 5. A pregnancy test will be performed and results confirmed as  
672 negative on all study subjects prior to any PET procedures. Subjects will be  
673 administered <sup>18</sup>F-fluoride (2.2 MBq/kg) via IV injection. Thirty minutes post-injection, the  
674 subjects will be placed within the PET scanner (GE Advance NXi) and imaged in 3D  
675 PET mode for 5 minutes per bed position. In addition, a 3 minute emission scan will be  
676 obtained for attenuation correction. Two bed positions (15.4 cm axial field of view each)  
677 will be acquired over the lumbar spine and hip region. These data will be reconstructed  
678 into transverse slices using the iterative ordered-subset, expectation maximization  
679 algorithm. The decay-corrected administered dose and the subject's body mass will be  
680 entered such that the reconstructed data will be in units of the standard uptake value  
681 (SUV). Regions of interest (ROIs) will be manually defined over specified areas within  
682 the lumbar spine and the hip. The mean and maximum SUV value within the ROI will be  
683 recorded. The precision of PET (%CV) is 3%. The effective dose associated with a  
684 single <sup>18</sup>F-PET scan is 3.5 mSv. Our primary endpoint, SUV, will be calculated according  
685 to the formula  $SUV=A/(ID/m)$ , where *A* is the mean tissue activity ( $\mu$ Ci/g) within the  
686 volume of interest, *ID* is the injected dose (mCi), and *m* is the patient body weight (kg).  
687

688 *D7d. Other Measures*

689 Height will be measured for each subject upon admission in a standardized fashion,  
690 using the same wall-mounted stadiometer. Weights will also be obtained each morning  
691 on the same digital scale, with patients clothed in a hospital gown, in a fasting state,  
692 after voiding. BMI will be calculated. Surveys will be used to quantify both nutritional  
693 intake and physical activity prior to admission. The Youth/Adolescent Questionnaire  
694 (Appendix E) is a detailed, semi-quantitative food frequency questionnaire, validated for

695 use in this age group, which will provide a detailed measure of calcium and vitamin D  
 696 intake, as well as other nutrients<sup>124,125</sup>. Participants will also complete the  
 697 Youth/Adolescent Activity Questionnaire (Appendix F), a validated and reproducible  
 698 measure of typical time spent, over the past year, in various activities and team  
 699 sports<sup>126,127</sup>. Study personnel will obtain a brief medical history from each participant,  
 700 including information regarding medication use, past medical history, menstrual history,  
 701 and smoking history, as these are all important potential covariates of bone health.

702  
 703  
 704  
 705

D7e. Summary: Data Collection, Phase 1

|                | Day 1<br>(baseline) | Day 2 | Day 3 | Day 4 | Day 5 |
|----------------|---------------------|-------|-------|-------|-------|
| Bone markers   | X                   | X     | X     | X     | X     |
| Hormone levels | X                   | X     | X     | X     | X     |
| PET scan       | X                   |       |       |       | X     |
| 25(OH)D        | X                   |       |       |       |       |
| PTH            | X                   |       |       |       |       |
| Height/Weight  | X                   | X     | X     | X     | X     |
| YAQ/YAAQ       |                     |       | X     |       |       |

706  
 707  
 708  
 709  
 710  
 711  
 712  
 713  
 714  
 715  
 716  
 717  
 718  
 719  
 720  
 721  
 722  
 723  
 724  
 725  
 726  
 727  
 728  
 729  
 730  
 731

**D8. Logistical Issues and Data Collection: Phase 2**

D8a. Patient Enrollment

Enrollment for the outpatient phase of the study will also occur on an ongoing basis. Potential study subjects will be identified within the CHB Eating Disorder Program, from local area pediatric practices, and by local advertisements (Appendices B, C, and H). This recruitment approach has led to the successful enrollment of over 150 adolescents with AN for participation in our previous longitudinal studies. We will recruit an additional 10 patients into each group (intervention and control) to address potential loss to follow-up. Subjects will undergo the process of informed consent described above (D7a). After consent is obtained, subjects will complete a baseline study visit and will be randomized to treatment group by use of randomization envelopes. Study staff (study coordinator, PI) will be aware of the subjects' randomization status. However, our outcome measures are objective, and the personnel who analyze the objective measures will not be aware of treatment status. After the baseline visit, subjects will be instructed by the study coordinator as to use of the plate, and sent home with either the vibrating or placebo plate. To maximize participant adherence, a study coordinator will contact each subject monthly to address any participant concerns or questions.

D8b. Laboratory Procedures

All laboratory tests will be drawn at the same time of day at each study visit to account for differences in diurnal variation that occur with the markers of bone turnover. As is standard protocol in the CTSU, a pregnancy test will be performed at the baseline and 6-month visit prior to any skeletal assessments.

| Test Name | Analysis Method              | Laboratory      | Frequency  | Intra-Assay Precision |
|-----------|------------------------------|-----------------|------------|-----------------------|
| BSAP      | Chemiluminescent immunoassay | HCCL or MGH CLR | Q 3 months | 1.5-2.6%              |
| CTx       | ELISA                        | HCCL or MGH CLR | Q 3 months | 5.2-6.8%              |

|             |                                 |                    |            |          |
|-------------|---------------------------------|--------------------|------------|----------|
| Osteocalcin | ELISA                           | HCCL<br>or MGH CLR | Q 3 months | 5.5-5.7% |
| PTH         | ECLIA                           | LabCorp            | Baseline   | 6.2%     |
| 25(OH)D     | Chemiluminescent<br>immunoassay | LabCorp            | Baseline   | 7.3%     |
| IGF-I       | EIA                             | HCCL<br>or MGH CLR | Q 3 months | 6.6-9.7% |
| Adiponectin | EIA                             | HCCL<br>or MGH CLR | Q 3 months | 5.0-5.4% |
| Leptin      | RIA                             | HCCL<br>or MGH CLR | Q 3 months | 5.2-7.5% |
| Insulin     | Chemiluminescent<br>immunoassay | HCCL<br>or MGH CLR | Q 3 months | 2.0-4.2% |
| Cortisol    | Chemiluminescent<br>immunoassay | HCCL<br>or MGH CLR | Q 3 months | 4.4-6.7% |

732 BSAP: bone specific alkaline phosphatase; CTx: serum C-terminal telopeptide of type 1 collagen;  
733 PTH: parathyroid hormone; 25(OH)D: 25-hydroxyvitamin D; IGF-I: insulin-like growth factor-I  
734  
735

736 D8c. Skeletal Assessments

737  
738 Peripheral quantitative computed tomography (pQCT): pQCT measurements of vBMD  
739 will be obtained in subjects at the mid-shaft of the tibia and the proximal radius using the  
740 Stratec XCT 3000 pQCT scanner (Orthometrix, White Plains, NY) at baseline and 6  
741 months of treatment. Radiation dose per pQCT exam is 1.0 µSv effective dose  
742 equivalent. Average % CV is 1%. One technologist will perform all pQCT measurements  
743 for this protocol to avoid inter-operator variability.  
744

745 Dual-energy X-ray absorptiometry (DXA): A DXA scan of the total body will be obtained  
746 at baseline and 6 months using the Hologic Discovery A scanner (Hologic Inc., Waltham,  
747 MA) to assess body composition [lean body mass (kg), total fat mass (kg), percentage  
748 body fat] at each time point. These measures will allow us to evaluate for changes in  
749 body composition occurring as a result of LMMS over the course of the investigation.  
750 Precision is monitored daily in the CHB DXA Center using standardized phantoms  
751 provided by the manufacturer (Hologic, Inc.); average % CV is 0.454 ± 0.004%. One  
752 technologist will perform all DXA measurements for this protocol to avoid inter-operator  
753 variability.  
754

755 Biochemical markers of bone turnover: The same biomarkers of bone formation and  
756 resorption described in Section D7c will be utilized in Phase 2 of the study. Markers will  
757 be measured at 3 month intervals for the 6-month period of the LMMS intervention.  
758

759 D8d. Other Measures

760 Height and weight will be measured at each study visit, in a standardized fashion  
761 (Section D7d). At every visit, all subjects will be asked to complete a 3-day dietary recall  
762 with one of the CTSU nutritionists to quantify their recent nutritional intake. Physical  
763 activity will also be quantified at each visit, by use of the Stanford Seven-Day Activity  
764 Recall (Appendix G)<sup>128,129</sup>. We will administer validated psychological instruments [Beck  
765 Depression Inventory<sup>130</sup> (Beck Depression Inventory-II for ages 13 and above, and Beck  
766 Youth Inventory-II for ages 11 to 13), Spielberger State/Trait Inventory<sup>131</sup> (an anxiety  
767 assessment), Eating Attitudes Test<sup>132</sup> (a tool for evaluation of body image and anorexic  
768 behavior)] upon admission and approaching the time of discharge to evaluate for



769 differences in subjective well-being, mood, and body image between time periods. As  
 770 anorexic patients who are more psychologically ill tend to also be more physically ill,  
 771 these psychological measures will allow us to assess the psychological phenotype of the  
 772 study patients. We will include these measures as important covariates. Please see  
 773 attached Appendix D for the individual instruments. Data will be downloaded from the  
 774 LMMS plate regarding total minutes of use at the final study visit; these data will provide  
 775 an assessment of subject compliance. Hormonal concentrations will be measured at 3-  
 776 month intervals, to determine whether subjects' hormonal status is normalizing. Interval  
 777 health history will be obtained from subjects at each study visit, include questions  
 778 regarding return of menses. Study participants who are pre-menarchal will have a single  
 779 X-ray of the left wrist obtained for bone age at the baseline visit, to allow for appropriate  
 780 interpretation of the bone density results.

781  
 782  
 783

*D8e: Summary: Data Collection, Phase 2*

|                           | <b>Baseline</b> | <b>3 months</b> | <b>6 months</b> |
|---------------------------|-----------------|-----------------|-----------------|
| pQCT, radius              | X               |                 | X               |
| pQCT, tibia               | X               |                 | X               |
| DXA, total body           | X               |                 | X               |
| Bone age (if needed)      | X               |                 |                 |
| Bone markers              | X               | X               | X               |
| Height/Weight             | X               | X               | X               |
| Dietary recall            | X               | X               | X               |
| Activity survey           | X               | X               | X               |
| Psychological instruments | X               |                 | X               |
| Interval health hx        | X               |                 | X               |
| Compliance data           | X               | X               | X               |
| Hormonal levels           | X               | X               | X               |

784

*D8f: Phase 2 sub-study*

786 As an antecedent to Phase 2 of the study, a short-term outpatient sub-study will take  
 787 place during enrollment of Phase 1. A total of 10 subjects with AN will be enrolled  
 788 following the same inclusion and exclusion criteria for Phase 2 [D3b]. Recruitment of  
 789 patients will mirror the strategies approved for Phase 2 of the study [D8a], and  
 790 participants will be randomized in the same manner as will be done in Phase 2 [D8a].  
 791 Participants will be sent home with either a placebo or vibrating (0.3g, 32-37Hz)  
 792 platform, and instructed to stand on the platform for 10 minutes per day for the duration  
 793 of the 3 month period. This initial sub-study will be done prior to Phase 2, and will be  
 794 used to obtain the following; (a) a baseline pool of pQCT data for adolescent girls with  
 795 AN; (b) an assessment of participant compliance with the platform device in our patient  
 796 population; and, (c) preliminary data on the impact of LMMS intervention on bone  
 797 formation and resorption markers.

798

799 Subjects will complete a baseline visit consistent with that of the baseline for Phase 2 of  
 800 the study [D8a—D8e] the only exception being that the patient would not undergo a DXA  
 801 scan. Ambulatory assessment and bone density markers will be taken. The subject with  
 802 undergo a pQCT scan to measure bone geometry and strength. Subjects will  
 803 additionally be asked questions regarding their health history, and be responsible for  
 804 filling out questionnaires regarding their activity level. Participants will be asked to  
 805 complete a second study visit upon the conclusion of the 3 month study period. This

806 visit will be identical in nature to the baseline, except that a pQCT scan will not be taken.  
807 Patients will be reimbursed \$25 at the baseline visit. An additional \$50 Gift Card will be  
808 allotted to participants upon completion of the 3 month trial period.  
809

810 The compliance data obtained will be used to provide support for the results from Phase  
811 2 of the study. pQCT data will be used to provide a control group for adolescent girls  
812 with AN with which to interpret our participant data.  
813

#### 814 **D9. Data Management and Quality Control Methods**

815 Data will be organized on standardized case report forms, developed in conjunction with  
816 the CHB Clinical Research Program. Confidential study identification numbers will be  
817 assigned to each subject. All potentially identifying information will be removed from the  
818 data collection forms. A key, linking the study identification number to the subjects'  
819 personal identifying information, will be kept in a secured location. The hard copies will  
820 be kept in secured research files in a locked file cabinet, and an office with a locked  
821 door. The data will be entered into an FDA-approved, CHB-operated database (RedCap)  
822 and kept in a password-protected computer file. We will use logic rules and range  
823 checks to ensure the accuracy and completeness of the database. A limited number of  
824 investigators will be obtaining study consent or subject evaluation. Data audits will be  
825 used. The principal investigator will review study folders at regularly scheduled intervals.  
826 Subject safety, including utilization of a Data and Safety Monitoring Board, is addressed  
827 in Section E.  
828

#### 829 **D10. Statistical Analyses**

##### 830 *D10a. Statistical Analyses: Phase 1*

831 The **primary test of hypothesis** for Phase 1 is a comparison of the mean change in  
832 PET intensity between the two trial arms. PET scans from baseline and Day 5 will be  
833 evaluated using repeated measures analysis of variance (ANOVA), adding terms for trial  
834 arm and time x arm interaction. We will estimate the mean rate of change in each arm  
835 from parameters of the fitted model and compare arms, assessing statistical significance  
836 from the interaction term. We will also compare mean change in serum biomarkers of  
837 bone turnover (BSAP, OC, CTx) between the two trial arms. Each marker from all 5 days  
838 will be evaluated in turn using repeated measures ANOVA, adding terms for trial arm  
839 and time x arm interaction. We expect to demonstrate a decline in resorption markers  
840 and increase in formation markers in the LMMS arm compared with the non-intervention  
841 arm. Baseline clinical characteristics will be compared between the two groups using a  
842 two-sample t-test. Repeated measures ANOVA will be used to evaluate changes in  
843 anthropometric variables and body composition over time in the two groups. Hormonal  
844 concentrations, likewise measured at all 5 days, will be analyzed similarly.  
845

##### 846 *D10b. Statistical Analyses: Phase 2*

847 The **primary test of hypothesis** for Phase 2 is a comparison of the mean change in  
848 vTBMD, as measured by pQCT, between the two trial arms. At 6 months, we will  
849 calculate each subject's change from baseline and construct a 95% confidence interval  
850 about the mean change. We will perform **repeated-measures analysis of variance**  
851 (ANOVA) on the baseline and 6-month values together, taking account of intra-subject  
852 correlation over the two time points. **Secondary endpoints**, including other pQCT and  
853 DXA measures, will be analyzed similarly over the two time points. A per protocol  
854 analysis will also be conducted to determine whether any relationship exists between  
855 cumulative exposure to LMMS (number of total minutes spent on the platform during the  
856 trial) and absolute and/or percentage change in vBMD of the tibia, or if a threshold

857 response is reached. Additionally, to determine whether the vBMD response altered  
858 with compliance, the interaction between treatment group and cumulative exposure to  
859 LMMS will be entered into the model.

860

861 Baseline clinical characteristics will be compared between the two groups using a two-  
862 sample t-test. Repeated measures ANOVA will be used to evaluate changes in  
863 anthropometric variables and body composition over time in the two groups. **DXA and**  
864 **pQCT** measurements from baseline and end of study and **bone turnover markers** from  
865 all 3 study visits will be evaluated using repeated-measures ANOVA as above, adding  
866 terms for trial arm and time x arm interaction. We will estimate the mean rate of change  
867 in each arm from parameters of the fitted model and compare arms, assessing statistical  
868 significance from the interaction term. We expect to demonstrate a decline in resorption  
869 markers and increase in formation markers in the LMMS arm compared with the non-  
870 intervention arm. Hormonal concentrations, likewise measured at all 3 study visits, will  
871 be analyzed similarly. Invariant and time-varying covariates (Section D6) will be added  
872 to the repeated measures to test for mediation or effect modification of the intervention  
873 effect.

874

875 Missing data: Analysis will follow the intention-to-treat principle, with all data attributed  
876 to the subject's assigned treatment group regardless of whether treatment was delivered  
877 or completed. We will test for selective attrition by comparing baseline data between  
878 dropouts and those completing the trial. If no differential bias between the two arms of  
879 the trial is evident, the simple repeated measures analyses can be made using just the  
880 available data. If bias cannot be ruled out, we will make a conservative imputation, such  
881 as assigning the opposite group's mean change or assuming zero change. For  
882 repeated-measures analysis, we can use all available data, including baseline data on  
883 dropouts, without incurring bias if the data are "missing at random," i.e., the likelihood of  
884 lost data is related only to variables accounted for in regression.

885

#### 886 *D10c. Sample size and power analysis*

887 All of our primary and secondary outcomes will be assessed with repeated-measures  
888 regression, comparing the time course of various bone measures, anthropometry, and  
889 biochemical markers between intervention and control subjects over  $k=2$  or 3 evenly  
890 spaced time points. For purposes of power analysis we define realized gain as a  
891 subject's outcome trend, estimated by the appropriate linear contrast among the  $k$   
892 evenly spaced measurements, multiplied by the duration of the study. For a measure  
893 taken only at the beginning and end of the study, realized gain is equivalent to the  
894 simple change. The standard error of realized gain, expressed as a percentage of the  
895 mean, is  $\sigma_k = CV \times (12(k-1)/k(k+1))^{1/2}$ , where CV indicates the coefficient of variation of  
896 the outcome (standard deviation for replicate measures of one subject on one occasion).  
897 The detectable difference in mean realized gain between two groups of  $n$  subjects is  
898 then  $(t_{\alpha/2} + t_{\beta}) (2/n)^{1/2} \sigma_k$ , where  $t_{\alpha/2}$  and  $t_{\beta}$  are Student t-deviates corresponding to the two-  
899 sided Type I error rate (critical p-value,  $\alpha$ ) and the power of the comparison ( $100\% \times (1 -$   
900  $\beta)$ ). This quantity is tabulated below for the primary and major secondary outcomes,  
901 using measurement parameters drawn from the literature and our prior data. The table  
902 shows that our planned sample sizes provide sufficient power to detect differences in  
903 mean realized change comparable to the measurement precision (CV), a lower limit of  
904 what would be considered clinically significant. These estimates are conservative  
905 because covariate adjustment can be expected to further reduce residual variance.

906

907 **Table. Power analysis for Phase 1 and Phase 2.**

| Phase | Duration | n/arm | Endpoint        | Measurements | CV, % of mean | Detectable difference,* % of mean |
|-------|----------|-------|-----------------|--------------|---------------|-----------------------------------|
| 1     | 5 d      | 30    | PET             | 2            | 10.0          | 10.4                              |
|       |          |       | BSAP            | 5            | 10.1          | 9.4                               |
|       |          |       | Osteocalcin     | 5            |               | 21.8                              |
| 2     | 6 mos    | 25    | vBMD (pQCT)     | 2            | 0.4 – 1.7     | 0.5 – 1.9                         |
|       |          |       | Body-mass index | 3            | 5.0           | 5.1                               |

\* Difference between arms in mean realized gain detectable with 80% power using 2-sided Type I error rate 5% in repeated-measures analysis.

## D11. Potential Limitations and Advantages

*D11a. Generalizability:* The population serviced by our clinic is not a representative sample of all US adolescents with eating disorders. However, in many respects, our demographics reflect national trends and observations. Our patients come from diverse socioeconomic backgrounds and attend variable educational centers (public, private, parochial schools). Subject recruitment will occur independently of these potentially confounding factors.

*D11b. Biomarkers of Bone Turnover:* Biomarkers of bone turnover are surrogate measures of bone formation and resorption. Despite significant improvements over last several years, these biomarkers still exhibit relatively wide variability, and are influenced by many external factors, including nutritional status and diurnal variation. Despite these shortcomings, they represent one of the few non-invasive tools we have to obtain a dynamic view of what is occurring at a cellular level within bone over the short-term.

*D11c. Strengths:* Despite these potential limitations, the proposed research plan offers a unique opportunity to investigate changes in bone health longitudinally, both in the short- and long-term. We also hope to discover the potential mechanisms contributing to skeletal changes over time. Using novel assessments of skeletal health, we will obtain data regarding not only bone density but also bone geometry and strength. The new insights gained from this project will provide a basis for future randomized trials in adolescents with AN and other pediatric patient populations at risk for bone loss.

## D12. Project Timetable

|                                |                                 | Year 1 | Year 2 | Year 3 | Year 4 | Year 5 |
|--------------------------------|---------------------------------|--------|--------|--------|--------|--------|
| <b>Research Aim 1</b>          | <b>Short-term effects: LMMS</b> |        |        |        |        |        |
|                                | Subject enrollment              | X      | X      | X      |        |        |
|                                | Data collection and management  | X      | X      | X      |        |        |
|                                | Data analyses                   |        | X      | X      |        |        |
|                                | Manuscript preparation          |        | X      | X      |        |        |
| <b>Research Aims 2 &amp; 3</b> | <b>Long-term effects: LMMS</b>  |        |        |        |        |        |
|                                | Subject enrollment              | X      | X      | X      | X      | X      |
|                                | Data collection and             | X      | X      | X      | X      |        |

|                            |                        |  |   |   |   |   |
|----------------------------|------------------------|--|---|---|---|---|
|                            | management             |  |   |   |   |   |
|                            | Data analyses          |  | X | X | X | X |
|                            | Manuscript preparation |  | X | X | X | X |
| <b>Prepare R01, revise</b> |                        |  |   |   | X | X |

939

940

**E. Human Subjects Research**

941

942

**E1. Protection of Human Subjects**

943

944

*E1a. Human Subjects Involvement and Characteristics*

945

946

947

948

949

950

951

952

953

954

955

956

Over 4 years, we will enroll adolescent females ages 11-22 years with a diagnosis of AN. Sixty subjects will be medically hospitalized inpatients (Phase 1), and 50 subjects will be ambulatory outpatients (Phase 2). All adolescents who meet these criteria will be recruited, as we believe that this age group is at significant risk to develop potentially lifelong skeletal complications of their illness. All subjects will undergo the full process of informed consent, in accordance with CHB IRB standards, prior to any research intervention or randomization procedure. Once consented, subjects will be randomized to receive either the LMMS intervention, or placebo (Phase 1)/no intervention (Phase 2). Subjects will undergo laboratory testing and imaging studies to evaluate skeletal health as previously described (Section D). All study procedures will take place at Children’s Hospital Boston.

957

*E1b. Sources of Materials*

958

959

960

961

962

963

964

965

966

967

968

969

970

971

972

973

974

975

976

977

During the inpatient phase of the study (Phase 1), the enrolled subjects will have a blood specimen obtained each morning (for a total of 5 samples). A PET scan with <sup>18</sup>fluoride labeling will be conducted at baseline and upon discharge. During the outpatient study (Phase 2), participants will consent to a blood draw for research purposes only during their study visits, which will occur every 3 months for a total of 3 visits. Imaging studies (DXA, pQCT) will also be performed during the course of the study to assess bone formation and bone strength. During both study phases, participants will complete questionnaires regarding recent nutritional intake and physical activity level. These tests are all conducted for research-only purposes, and are above any laboratory testing or imaging studies which may be ordered by the participant’s clinical team for purposes of clinical care. Neither the results of the laboratory measures, questionnaire data, nor imaging studies will be available within the participants’ medical records. Study participants will not be identified by name or medical record number on any study document except the study log, which will link the participant’s medical record number/name with assigned study ID number. This file will be kept separate from the other study documentation. All logs and data will be stored on password-protected computers in a locked office, or in a locked file cabinet. All research samples will be stored in a freezer in a locked room, labeled with the participant’s research ID number, and date and time of sample.

978

*E1c. Potential Risks*

979

980

981

982

983

984

Risk to the study participant will be minimized as much as possible, from both the intervention and the data collection. Use of the LMMS platform requires standing for 10 minutes at a time, which could lead to dizziness, light-headedness, or syncope. The blood draw may produce pain from the needle, a slight bruise, and/or (rarely) syncope. Radiological procedures to measure body composition as determined by DXA may involve the minor discomfort of lying still on a firm surface for approximately 15 minutes.

985 This study involves minimal exposure to radiation. During Phase 1, participants will only  
986 undergo PET scan; the effective dose associated with a single <sup>18</sup>F-PET scan is 3.5 mSv.  
987 We have also attempted to minimize radiation exposure during Phase 2. The radiation  
988 exposure from the total body DXA is approximately 40µSV, less than 1% of natural  
989 background radiation received by a person in Boston over one year (or ~1/10 that of a  
990 chest x-ray), about comparable to that received during a round-trip trans-Atlantic plane  
991 flight. Bone strength will be determined by pQCT. The pQCT takes approximately 10  
992 minutes to complete at each site. Radiation exposure from pQCT is also quite small, a  
993 dose of 0.3 uSv effective dose per scan site, and does not involve gonadal exposure. All  
994 efforts will be made to keep subjects relaxed and comfortable for the duration of the test.  
995

## 996 **E2. Adequacy of Protection Against Risks**

### 997 *E2a. Recruitment and Informed Consent*

998 Members of the research team will obtain written informed consent from all potential  
999 study participants. If the potential subject is a minor (age <18 years), the parent or legal  
1000 guardian will be required to sign the study consent form. Informed assent will be also  
1001 obtained from the minor subject. If the potential subject is an adult (age >18 years), they  
1002 alone will be required to sign the study informed consent form. Subjects will have  
1003 sufficient time throughout the consent process to have all their questions answered, and  
1004 any concerns addressed. If the subject and/or parent express any desire to discontinue  
1005 the study at any point, the study will be terminated based on his or her wishes. The  
1006 CHB Institutional Review Board will approve the research protocol and all consent  
1007 forms prior to enrolling any study subjects.  
1008

### 1009 *E2b. Protection against Risk*

1010 During Phase 1, all subjects will be monitored by the inpatient medical team on a daily  
1011 basis due to the risks of refeeding. Clinical care will take priority over any study  
1012 intervention or data collection. Subjects will have vital signs monitored frequently  
1013 throughout the day, as is standard clinical care; if the subject is significantly hypotensive  
1014 or orthostatic by blood pressure, use of the LMMS device or placebo plate will be  
1015 delayed until later in the day when vitals have stabilized. The vibration induced by the  
1016 plate is barely detectable, and the frequency and amplitude chosen to maximize safety.  
1017 Additionally, each plate has an electronic compliance monitor which prevents the device  
1018 from being used for more than the 10 minute/day recommended duration; this will  
1019 prevent over-use of the intervention.  
1020

1021 All blood draws will take place with the subject in the supine position, to minimize risk of  
1022 syncope. A urine pregnancy test will be performed on all subjects prior to the skeletal  
1023 imaging assessments (PET, pQCT, DXA) due to the radiation exposure accompanying  
1024 these measurements. Results of this pregnancy test are confidential, and will be relayed  
1025 to the study participant in private. Results will not be disclosed to a parent or guardian  
1026 without permission of the study participant. This policy is outlined in the consent forms.  
1027 If the participant experiences any psychological distress after completing a study  
1028 questionnaire, study personnel will be available to discuss any concerns or questions  
1029 that the subject has.  
1030

1031 Confidentiality will be protected. Participants will not be identified by name or medical  
1032 record number on any study data forms or lab specimens, only by their study ID number.  
1033 Only study investigators will have access to the study logs and the data forms, which will  
1034 be stored in a locked file cabinet in a locked office. Data collected from participants will  
1035 be placed into this secured location within 24 hours of its acquisition. All staff involved in

1036 research subject interaction and data collection will have up to date human research  
1037 protection training, as is mandated by the CHB IRB.

1038  
1039 Monitoring and reporting of adverse events will comply with the Children's Hospital  
1040 Committee on Clinical Investigation and Clinical Research Center requirements. A Data  
1041 Safety and Monitoring Board (DSMB) will be appointed for this protocol. During Phase  
1042 1, all participants will be on the inpatient medical unit of Children's Hospital, with 24 hour  
1043 medical staff available should any medical issues arise. During Phase II, participants  
1044 will be monitored closely during the 6-month study period with laboratory assessments  
1045 and physical examinations at each visit. To assure patient safety, any participant who  
1046 develops bone loss of >5% from baseline by the 6 month study visit will have bone  
1047 density results relayed to their eating disorder specialist and/or primary care provider,  
1048 and assistance in arranging specialty referrals (i.e. to the Bone Health Clinic) as needed.  
1049 Bone loss will be monitored by the study DSMB. All study participants will be able to  
1050 contact one of the study physicians at any time if questions or concerns arise.

1051  
1052 No confidential information from this study or other data within a patient's medical record  
1053 may be furnished to anyone unaffiliated with Children's Hospital without written consent,  
1054 except as required by law or regulatory agencies (e.g., FDA).

1055  
1056 **E3. Potential Benefits of the Proposed Research to the Subjects and Others**  
1057 We believe that the possibility for direct benefit exists, given the positive effects on bone  
1058 density and bone strength seen with use of the LMMS device in other populations at  
1059 high risk for bone deficits. Adolescents who participate in the study will receive free  
1060 bone density measurements, as well as endocrinologic evaluation. Participants will be  
1061 given information about their vitamin D status and bone density results, which they may  
1062 elect to share with their primary care provider. If significant skeletal deficits or vitamin D  
1063 deficiency is identified, study staff will obtain permission from the subject to share the  
1064 relevant information with the subjects' clinical team. With the information gathered from  
1065 the proposed study, we hope to develop evidence-based guidelines for the use of LMMS  
1066 as an intervention to protect against deleterious changes in bone health. This study has  
1067 the potential to benefit a large number of patients who suffer from AN.

1068  
1069 **E4. Importance of the Knowledge to Be Gained**  
1070 Loss of bone mineral density is a well-established complication of AN, with potential  
1071 long-term consequences including osteoporosis and increased future fracture risk. Both  
1072 preventative and treatment strategies to date have been met with limited success. We  
1073 are hopeful that use of the mechanical stimulation platform will prove a safe, effective  
1074 means of improving the bone health of the many young women who suffer from this  
1075 illness. Our results will also spearhead similar investigations in other at-risk populations,  
1076 including pediatric patients with cystic fibrosis, chronic kidney disease, and inflammatory  
1077 bowel disease.

1078  
1079 **E5. Data and Safety Monitoring Plan**  
1080 During Phase 1, all subjects will be monitored by the inpatient medical team on a daily  
1081 basis due to the risks of refeeding. Clinical care will take priority over any study  
1082 intervention or data collection. Subjects will have vital signs monitored frequently  
1083 throughout the day, as is standard clinical care; if the subject is significantly hypotensive  
1084 or orthostatic by blood pressure, use of the LMMS device or placebo plate will be  
1085 delayed until later in the day when vitals have stabilized. During Phase 2, participants  
1086 will be monitored closely during the 6-month study period with laboratory assessments

1087 and physical examinations every three months. To assure patient safety, any participant  
1088 who develops bone loss of >5% from baseline by the 6 month study visit will have bone  
1089 density results relayed to their eating disorder specialist and/or primary care provider,  
1090 and assistance in arranging specialty referrals (i.e. to the Bone Health Clinic) as needed.  
1091 Bone loss will be monitored by the study DSMB. All adverse events occurring  
1092 throughout the course of the study will be reported by the principal investigator to both  
1093 the CHB IRB as well as the DSMB, which will meet on a regular basis (every 6 months).

1094  
1095 During the 6-month study, LMMS outpatient participants will complete a depression  
1096 scale, anxiety scale, and eating attitudes test at the baseline and 6 month visits. These  
1097 scales will be scored and screened at the time of the subjects' study visits. Any subject  
1098 who reports a high level of depressive symptoms (defined as a Beck Depression Index  
1099 score  $\geq 20$ ) or who circles a response other than "0" to question 9 (which addresses  
1100 suicidal ideation; see Appendix D) will be referred to a mental health provider or their  
1101 medical provider at the time of the study visit according to standard clinical practice. The  
1102 EAT questionnaire will be flagged for scores of 20 or more and/or for positive responses  
1103 to questions A-D, and the State Trait Anxiety Index will be flagged for scores of 65 or  
1104 higher; the appropriate medical provider will be contacted in response to these events.  
1105 Study personnel will not leave a participant alone if she expresses thoughts of harming  
1106 herself. This will assure the participant's safety is the top priority.

1107  
1108 All study participants will be able to contact one of the study physicians at any time if  
1109 questions or concerns arise. No confidential information from this study or other data  
1110 within a patient's medical record may be furnished to anyone unaffiliated with Children's  
1111 Hospital without written consent, except as required by law or regulatory agencies (e.g.,  
1112 FDA).

#### 1113 1114 *Inclusion of Women and Minorities*

1115 This study will be conducted without regard to race/ethnicity, and we will make every  
1116 effort to enroll adolescents of color. However, given the known epidemiology of AN, we  
1117 expect that the majority of study subjects will be of Caucasian background. All study  
1118 subjects will be female, as 90-95% of adolescents with anorexia nervosa are females<sup>3</sup>.

#### 1119 1120 *Inclusion of Children*

1121 This study will include children, as we will be recruiting adolescents ages 11-22 years  
1122 with a diagnosis of AN. We will not include younger patients due to the influence of age,  
1123 pubertal stage, and growth on our primary outcome measures.

#### 1124 1125 **H. Literature Cited**

- 1126  
1127 1. Kanis JA. Assessment of fracture risk: Who should be screened? In: Favus MJ,  
1128 ed. *Primer on the metabolic bone diseases and disorders of mineral metabolism.*  
1129 *Fifth ed.* Washington, D.C.: American Society for Bone and Mineral Research;  
1130 2003:316-323.  
1131 2. Eastell R. Pathogenesis of postmenopausal osteoporosis. In: Favus MJ, ed.  
1132 *Primer on the metabolic bone diseases and disorders of mineral metabolism.*  
1133 *Fifth ed.* Washington, D.C.: American Society for Bone and Mineral Research;  
1134 2003:314-316.  
1135 3. Silber TJ. Anorexia nervosa among children and adolescents. *Adv. Pediatr.*  
1136 2005;52:49-76.



- 1137 4. Golden NH. Eating disorders in adolescence: what is the role of hormone  
1138 replacement therapy? *Curr. Opin. Obstet. Gynecol.* Oct 2007;19(5):434-439.
- 1139 5. Bachrach LK, Guido D, Katzman D, Litt IF, Marcus R. Decreased bone density in  
1140 adolescent girls with anorexia nervosa. *Pediatrics.* Sep 1990;86(3):440-447.
- 1141 6. Grinspoon S, Thomas E, Pitts S, et al. Prevalence and predictive factors for  
1142 regional osteopenia in women with anorexia nervosa. *Ann. Intern. Med.* Nov 21  
1143 2000;133(10):790-794.
- 1144 7. Golden NH. Osteopenia and osteoporosis in anorexia nervosa. *Adolesc. Med.*  
1145 Feb 2003;14(1):97-108.
- 1146 8. van der Wiel HE, Lips P, Nauta J, Netelenbos JC, Hazenberg GJ. Biochemical  
1147 parameters of bone turnover during ten days of bed rest and subsequent  
1148 mobilization. *Bone Miner.* May 1991;13(2):123-129.
- 1149 9. Heer M, Baecker N, Mika C, Boese A, Gerzer R. Immobilization induces a very  
1150 rapid increase in osteoclast activity. *Acta Astronaut.* Jul 2005;57(1):31-36.
- 1151 10. Gordon CM, Goodman E, Emans SJ, et al. Physiologic regulators of bone  
1152 turnover in young women with anorexia nervosa. *J. Pediatr.* Jul 2002;141(1):64-  
1153 70.
- 1154 11. Soyka LA, Misra M, Frenchman A, et al. Abnormal bone mineral accrual in  
1155 adolescent girls with anorexia nervosa. *J. Clin. Endocrinol. Metab.* Sep  
1156 2002;87(9):4177-4185.
- 1157 12. Klibanski A, Biller BM, Schoenfeld DA, Herzog DB, Saxe VC. The effects of  
1158 estrogen administration on trabecular bone loss in young women with anorexia  
1159 nervosa. *J. Clin. Endocrinol. Metab.* Mar 1995;80(3):898-904.
- 1160 13. Caillot-Augusseau A, Lafage-Proust MH, Margailan P, et al. Weight gain  
1161 reverses bone turnover and restores circadian variation of bone resorption in  
1162 anorexic patients. *Clin. Endocrinol. (Oxf).* Jan 2000;52(1):113-121.
- 1163 14. Misra M, Aggarwal A, Miller KK, et al. Effects of anorexia nervosa on clinical,  
1164 hematologic, biochemical, and bone density parameters in community-dwelling  
1165 adolescent girls. *Pediatrics.* Dec 2004;114(6):1574-1583.
- 1166 15. Soyka LA, Grinspoon S, Levitsky LL, Herzog DB, Klibanski A. The effects of  
1167 anorexia nervosa on bone metabolism in female adolescents. *J. Clin. Endocrinol.*  
1168 *Metab.* Dec 1999;84(12):4489-4496.
- 1169 16. Jagielska G, Wolanczyk T, Komender J, Tomaszewicz-Libudzic C, Przedlacki J,  
1170 Ostrowski K. Bone mineral density in adolescent girls with anorexia nervosa--a  
1171 cross-sectional study. *Eur. Child Adolesc. Psychiatry.* Apr 2002;11(2):57-62.
- 1172 17. Biller BM, Saxe V, Herzog DB, Rosenthal DI, Holzman S, Klibanski A.  
1173 Mechanisms of osteoporosis in adult and adolescent women with anorexia  
1174 nervosa. *J. Clin. Endocrinol. Metab.* Mar 1989;68(3):548-554.
- 1175 18. Audi L, Vargas DM, Gussinye M, Yeste D, Marti G, Carrascosa A. Clinical and  
1176 biochemical determinants of bone metabolism and bone mass in adolescent  
1177 female patients with anorexia nervosa. *Pediatr. Res.* Apr 2002;51(4):497-504.
- 1178 19. Turner JM, Bulsara MK, McDermott BM, Byrne GC, Prince RL, Forbes DA.  
1179 Predictors of low bone density in young adolescent females with anorexia  
1180 nervosa and other dieting disorders. *Int. J. Eat. Disord.* Nov 2001;30(3):245-251.
- 1181 20. Rigotti NA, Neer RM, Skates SJ, Herzog DB, Nussbaum SR. The clinical course  
1182 of osteoporosis in anorexia nervosa. A longitudinal study of cortical bone mass.  
1183 *JAMA.* Mar 6 1991;265(9):1133-1138.
- 1184 21. Bachrach LK, Katzman DK, Litt IF, Guido D, Marcus R. Recovery from  
1185 osteopenia in adolescent girls with anorexia nervosa. *J. Clin. Endocrinol. Metab.*  
1186 Mar 1991;72(3):602-606.

- 1187 22. Valla A, Groenning IL, Syversen U, Høiseith A. Anorexia nervosa: slow regain of  
1188 bone mass. *Osteoporos. Int.* 2000;11(2):141-145.
- 1189 23. Hartman D, Crisp A, Rooney B, Rackow C, Atkinson R, Patel S. Bone density of  
1190 women who have recovered from anorexia nervosa. *Int. J. Eat. Disord.* Jul  
1191 2000;28(1):107-112.
- 1192 24. Bass SL, Saxon L, Corral AM, et al. Near normalisation of lumbar spine bone  
1193 density in young women with osteopenia recovered from adolescent onset  
1194 anorexia nervosa: a longitudinal study. *J. Pediatr. Endocrinol. Metab.* Sep  
1195 2005;18(9):897-907.
- 1196 25. Golden NH, Lanzkowsky L, Schebendach J, Palestro CJ, Jacobson MS, Shenker  
1197 IR. The effect of estrogen-progestin treatment on bone mineral density in  
1198 anorexia nervosa. *J. Pediatr. Adolesc. Gynecol.* Jun 2002;15(3):135-143.
- 1199 26. Gordon CM, Grace E, Emans SJ, et al. Effects of oral dehydroepiandrosterone  
1200 on bone density in young women with anorexia nervosa: a randomized trial. *J.*  
1201 *Clin. Endocrinol. Metab.* Nov 2002;87(11):4935-4941.
- 1202 27. Grinspoon S, Thomas L, Miller K, Herzog D, Klibanski A. Effects of recombinant  
1203 human IGF-I and oral contraceptive administration on bone density in anorexia  
1204 nervosa. *J. Clin. Endocrinol. Metab.* Jun 2002;87(6):2883-2891.
- 1205 28. Liu SL, Lebrun CM. Effect of oral contraceptives and hormone replacement  
1206 therapy on bone mineral density in premenopausal and perimenopausal women:  
1207 a systematic review. *Br. J. Sports Med.* Jan 2006;40(1):11-24.
- 1208 29. Gordon CM, Grace E, Emans SJ, Goodman E, Crawford MH, Leboff MS.  
1209 Changes in bone turnover markers and menstrual function after short-term oral  
1210 DHEA in young women with anorexia nervosa. *J. Bone Miner. Res.* Jan  
1211 1999;14(1):136-145.
- 1212 30. Grinspoon S, Baum H, Lee K, Anderson E, Herzog D, Klibanski A. Effects of  
1213 short-term recombinant human insulin-like growth factor I administration on bone  
1214 turnover in osteopenic women with anorexia nervosa. *J. Clin. Endocrinol. Metab.*  
1215 Nov 1996;81(11):3864-3870.
- 1216 31. Munns CF, Rauch F, Travers R, Glorieux FH. Effects of intravenous pamidronate  
1217 treatment in infants with osteogenesis imperfecta: clinical and histomorphometric  
1218 outcome. *J. Bone Miner. Res.* Jul 2005;20(7):1235-1243.
- 1219 32. Henderson RC, Lark RK, Kecskemethy HH, Miller F, Harcke HT, Bachrach SJ.  
1220 Bisphosphonates to treat osteopenia in children with quadriplegic cerebral palsy:  
1221 a randomized, placebo-controlled clinical trial. *J. Pediatr.* Nov 2002;141(5):644-  
1222 651.
- 1223 33. Allgrove J. Use of bisphosphonates in children and adolescents. *J. Pediatr.*  
1224 *Endocrinol. Metab.* 2002;15 Suppl 3:921-928.
- 1225 34. Golden NH, Iglesias EA, Jacobson MS, et al. Alendronate for the treatment of  
1226 osteopenia in anorexia nervosa: a randomized, double-blind, placebo-controlled  
1227 trial. *J. Clin. Endocrinol. Metab.* Jun 2005;90(6):3179-3185.
- 1228 35. Miller KK, Grieco KA, Mulder J, et al. Effects of risedronate on bone density in  
1229 anorexia nervosa. *J. Clin. Endocrinol. Metab.* Aug 2004;89(8):3903-3906.
- 1230 36. Schneider V, Oganov V, LeBlanc A, et al. Bone and body mass changes during  
1231 space flight. *Acta Astronaut.* Oct-Dec 1995;36(8-12):463-466.
- 1232 37. Frost HM, Jee WS. On the rat model of human osteopenias and osteoporoses.  
1233 *Bone Miner.* Sep 1992;18(3):227-236.
- 1234 38. Bikle DD, Halloran BP. The response of bone to unloading. *J. Bone Miner.*  
1235 *Metab.* 1999;17(4):233-244.
- 1236 39. Trebacz H. Disuse-induced deterioration of bone strength is not stopped after  
1237 free remobilization in young adult rats. *J. Biomech.* Dec 2001;34(12):1631-1636.

- 1238 40. Doty SB, DiCarlo EF. Pathophysiology of immobilization osteoporosis. *Curr Opin*  
1239 *Orthop.* Oct 1995;6(5):45-49.
- 1240 41. Fukuoka H, Nishimura Y, Haruna M, et al. Effect of bed rest immobilization on  
1241 metabolic turnover of bone and bone mineral density. *J Gravit Physiol.* Jan  
1242 1997;4(1):S75-81.
- 1243 42. Bagi CM, Miller SC. Comparison of osteopenic changes in cancellous bone  
1244 induced by ovariectomy and/or immobilization in adult rats. *Anat. Rec.* Jul  
1245 1994;239(3):243-254.
- 1246 43. Lueken SA, Arnaud SB, Taylor AK, Baylink DJ. Changes in markers of bone  
1247 formation and resorption in a bed rest model of weightlessness. *J. Bone Miner.*  
1248 *Res.* Dec 1993;8(12):1433-1438.
- 1249 44. Kaneps AJ, Stover SM, Lane NE. Changes in canine cortical and cancellous  
1250 bone mechanical properties following immobilization and remobilization with  
1251 exercise. *Bone.* Nov 1997;21(5):419-423.
- 1252 45. Kannus P, Sievanen H, Jarvinen TL, et al. Effects of free mobilization and low- to  
1253 high-intensity treadmill running on the immobilization-induced bone loss in rats. *J.*  
1254 *Bone Miner. Res.* Oct 1994;9(10):1613-1619.
- 1255 46. Bourrin S, Palle S, Genty C, Alexandre C. Physical exercise during remobilization  
1256 restores a normal bone trabecular network after tail suspension-induced  
1257 osteopenia in young rats. *J. Bone Miner. Res.* May 1995;10(5):820-828.
- 1258 47. Herzog DB, Dorer DJ, Keel PK, et al. Recovery and relapse in anorexia and  
1259 bulimia nervosa: a 7.5-year follow-up study. *J. Am. Acad. Child Adolesc.*  
1260 *Psychiatry.* Jul 1999;38(7):829-837.
- 1261 48. Vicente-Rodriguez G. How does exercise affect bone development during  
1262 growth? *Sports Med.* 2006;36(7):561-569.
- 1263 49. Frost HM. Perspectives: a proposed general model of the "mechanostat"  
1264 (suggestions from a new skeletal-biologic paradigm). *Anat. Rec.* Feb  
1265 1996;244(2):139-147.
- 1266 50. Schoenau E, Neu MC, Manz F. Muscle mass during childhood--relationship to  
1267 skeletal development. *J Musculoskelet Neuronal Interact.* Mar 2004;4(1):105-  
1268 108.
- 1269 51. Specker BL, Schoenau E. Quantitative bone analysis in children: current  
1270 methods and recommendations. *J. Pediatr.* Jun 2005;146(6):726-731.
- 1271 52. Bailey DA, McKay HA, Mirwald RL, Crocker PR, Faulkner RA. A six-year  
1272 longitudinal study of the relationship of physical activity to bone mineral accrual in  
1273 growing children: the university of Saskatchewan bone mineral accrual study. *J.*  
1274 *Bone Miner. Res.* Oct 1999;14(10):1672-1679.
- 1275 53. Lanyon LE, Rubin CT. Static vs dynamic loads as an influence on bone  
1276 remodelling. *J. Biomech.* 1984;17(12):897-905.
- 1277 54. Mann V, Huber C, Kogianni G, Jones D, Noble B. The influence of mechanical  
1278 stimulation on osteocyte apoptosis and bone viability in human trabecular bone. *J*  
1279 *Musculoskelet Neuronal Interact.* Oct-Dec 2006;6(4):408-417.
- 1280 55. McKay HA, MacLean L, Petit M, et al. "Bounce at the Bell": a novel program of  
1281 short bouts of exercise improves proximal femur bone mass in early pubertal  
1282 children. *Br. J. Sports Med.* Aug 2005;39(8):521-526.
- 1283 56. Petit MA, McKay HA, MacKelvie KJ, Heinonen A, Khan KM, Beck TJ. A  
1284 randomized school-based jumping intervention confers site and maturity-specific  
1285 benefits on bone structural properties in girls: a hip structural analysis study. *J.*  
1286 *Bone Miner. Res.* Mar 2002;17(3):363-372.

- 1287 57. Mackelvie KJ, McKay HA, Khan KM, Crocker PR. A school-based exercise  
1288 intervention augments bone mineral accrual in early pubertal girls. *J. Pediatr.* Oct  
1289 2001;139(4):501-508.
- 1290 58. MacKelvie KJ, Khan KM, Petit MA, Janssen PA, McKay HA. A school-based  
1291 exercise intervention elicits substantial bone health benefits: a 2-year  
1292 randomized controlled trial in girls. *Pediatrics.* Dec 2003;112(6 Pt 1):e447.
- 1293 59. Nichols DL, Sanborn CF, Love AM. Resistance training and bone mineral density  
1294 in adolescent females. *J. Pediatr.* Oct 2001;139(4):494-500.
- 1295 60. Divasta AD, Beck TJ, Petit MA, Feldman HA, Leboff MS, Gordon CM. Bone  
1296 cross-sectional geometry in adolescents and young women with anorexia  
1297 nervosa: a hip structural analysis study. *Osteoporos. Int.* Jan 5 2007.
- 1298 61. Rauch F, Bailey DA, Baxter-Jones A, Mirwald R, Faulkner R. The 'muscle-bone  
1299 unit' during the pubertal growth spurt. *Bone.* May 2004;34(5):771-775.
- 1300 62. Hay PJ, Hall A, Delahunt JW, Harper G, Mitchell AW, Salmond C. Investigation  
1301 of osteopaenia in anorexia nervosa. *Aust. N. Z. J. Psychiatry.* Jun  
1302 1989;23(2):261-268.
- 1303 63. Joyce JM, Warren DL, Humphries LL, Smith AJ, Coon JS. Osteoporosis in  
1304 women with eating disorders: comparison of physical parameters, exercise, and  
1305 menstrual status with SPA and DPA evaluation. *J. Nucl. Med.* Mar  
1306 1990;31(3):325-331.
- 1307 64. Seeman E, Szmukler GI, Formica C, Tsalamandris C, Mestrovic R. Osteoporosis  
1308 in anorexia nervosa: the influence of peak bone density, bone loss, oral  
1309 contraceptive use, and exercise. *J. Bone Miner. Res.* Dec 1992;7(12):1467-1474.
- 1310 65. Rigotti NA, Nussbaum SR, Herzog DB, Neer RM. Osteoporosis in women with  
1311 anorexia nervosa. *N. Engl. J. Med.* Dec 20 1984;311(25):1601-1606.
- 1312 66. Thien V, Thomas A, Markin D, Birmingham CL. Pilot study of a graded exercise  
1313 program for the treatment of anorexia nervosa. *Int. J. Eat. Disord.* Jul  
1314 2000;28(1):101-106.
- 1315 67. Eisman JA. Good, good, good... good vibrations: the best option for better  
1316 bones? *Lancet.* Dec 8 2001;358(9297):1924-1925.
- 1317 68. Rubin C, Xu G, Judex S. The anabolic activity of bone tissue, suppressed by  
1318 disuse, is normalized by brief exposure to extremely low-magnitude mechanical  
1319 stimuli. *FASEB J.* Oct 2001;15(12):2225-2229.
- 1320 69. Ward K, Alsop C, Caulton J, Rubin C, Adams J, Mughal Z. Low magnitude  
1321 mechanical loading is osteogenic in children with disabling conditions. *J. Bone  
1322 Miner. Res.* Mar 2004;19(3):360-369.
- 1323 70. Garman R, Gaudette G, Donahue LR, Rubin C, Judex S. Low-level accelerations  
1324 applied in the absence of weight bearing can enhance trabecular bone formation.  
1325 *J. Orthop. Res.* Jun 2007;25(6):732-740.
- 1326 71. Xie L, Jacobson JM, Choi ES, et al. Low-level mechanical vibrations can  
1327 influence bone resorption and bone formation in the growing skeleton. *Bone.* Nov  
1328 2006;39(5):1059-1066.
- 1329 72. Gilsanz V, Wren TA, Sanchez M, Dorey F, Judex S, Rubin C. Low-level, high-  
1330 frequency mechanical signals enhance musculoskeletal development of young  
1331 women with low BMD. *J. Bone Miner. Res.* Sep 2006;21(9):1464-1474.
- 1332 73. Rubin C, Recker R, Cullen D, Ryaby J, McCabe J, McLeod K. Prevention of  
1333 postmenopausal bone loss by a low-magnitude, high-frequency mechanical  
1334 stimuli: a clinical trial assessing compliance, efficacy, and safety. *J. Bone Miner.  
1335 Res.* Mar 2004;19(3):343-351.

- 1336 **74.** Rubin C, Turner AS, Bain S, Mallinckrodt C, McLeod K. Anabolism. Low  
1337 mechanical signals strengthen long bones. *Nature*. Aug 9 2001;412(6847):603-  
1338 604.
- 1339 **75.** Hannan MT, Cheng DM, Green E, Swift C, Rubin CT, Kiel DP. Establishing the  
1340 compliance in elderly women for use of a low level mechanical stress device in a  
1341 clinical osteoporosis study. *Osteoporos. Int*. Nov 2004;15(11):918-926.
- 1342 **76.** Rubin C, Judex S, Qin YX. Low-level mechanical signals and their potential as a  
1343 non-pharmacological intervention for osteoporosis. *Age Ageing*. Sep 2006;35  
1344 Suppl 2:ii32-ii36.
- 1345 **77.** Hock JM, Centrella M, Canalis E. Insulin-like growth factor I has independent  
1346 effects on bone matrix formation and cell replication. *Endocrinology*. Jan  
1347 1988;122(1):254-260.
- 1348 **78.** Clemmons DR, Underwood LE, Dickerson RN, et al. Use of plasma  
1349 somatomedin-C/insulin-like growth factor I measurements to monitor the  
1350 response to nutritional repletion in malnourished patients. *Am. J. Clin. Nutr.* Feb  
1351 1985;41(2):191-198.
- 1352 **79.** Merimee TJ, Zapf J, Froesch ER. Insulin-like growth factors in the fed and fasted  
1353 states. *J. Clin. Endocrinol. Metab.* Nov 1982;55(5):999-1002.
- 1354 **80.** Hochberg Z, Hertz P, Colin V, et al. The distal axis of growth hormone (GH) in  
1355 nutritional disorders: GH-binding protein, insulin-like growth factor-I (IGF-I), and  
1356 IGF-I receptors in obesity and anorexia nervosa. *Metabolism*. Jan  
1357 1992;41(1):106-112.
- 1358 **81.** Grinspoon SK, Baum HB, Peterson S, Klibanski A. Effects of rhIGF-I  
1359 administration on bone turnover during short-term fasting. *J. Clin. Invest.* Aug  
1360 1995;96(2):900-906.
- 1361 **82.** Isley WL, Underwood LE, Clemmons DR. Changes in plasma somatomedin-C in  
1362 response to ingestion of diets with variable protein and energy content. *JPEN. J.*  
1363 *Parenter. Enteral Nutr.* Jul-Aug 1984;8(4):407-411.
- 1364 **83.** Grinspoon SK, Baum HB, Kim V, Coggins C, Klibanski A. Decreased bone  
1365 formation and increased mineral dissolution during acute fasting in young  
1366 women. *J. Clin. Endocrinol. Metab.* Dec 1995;80(12):3628-3633.
- 1367 **84.** Counts DR, Gwirtsman H, Carlsson LM, Lesem M, Cutler GB, Jr. The effect of  
1368 anorexia nervosa and refeeding on growth hormone-binding protein, the insulin-  
1369 like growth factors (IGFs), and the IGF-binding proteins. *J. Clin. Endocrinol.*  
1370 *Metab.* Sep 1992;75(3):762-767.
- 1371 **85.** Ebeling PR, Jones JD, O'Fallon WM, Janes CH, Riggs BL. Short-term effects of  
1372 recombinant human insulin-like growth factor I on bone turnover in normal  
1373 women. *J. Clin. Endocrinol. Metab.* Nov 1993;77(5):1384-1387.
- 1374 **86.** Turner RT, Riggs BL, Spelsberg TC. Skeletal effects of estrogen. *Endocr. Rev.*  
1375 Jun 1994;15(3):275-300.
- 1376 **87.** Sakata T, Wang Y, Halloran BP, Elalieh HZ, Cao J, Bikle DD. Skeletal unloading  
1377 induces resistance to insulin-like growth factor-I (IGF-I) by inhibiting activation of  
1378 the IGF-I signaling pathways. *J. Bone Miner. Res.* Mar 2004;19(3):436-446.
- 1379 **88.** Richards JB, Valdes AM, Burling K, Perks UC, Spector TD. Serum adiponectin  
1380 and bone mineral density in women. *J. Clin. Endocrinol. Metab.* Apr  
1381 2007;92(4):1517-1523.
- 1382 **89.** Mallamaci F, Tripepi G, Zoccali C. Leptin in end stage renal disease (ESRD): a  
1383 link between fat mass, bone and the cardiovascular system. *J Nephrol.* Jul-Aug  
1384 2005;18(4):464-468.

- 1385 90. Misra M, Miller KK, Cord J, et al. Relationships between serum adipokines,  
1386 insulin levels, and bone density in girls with anorexia nervosa. *J. Clin. Endocrinol.*  
1387 *Metab.* Jun 2007;92(6):2046-2052.
- 1388 91. Bosy-Westphal A, Brabant G, Haas V, et al. Determinants of plasma adiponectin  
1389 levels in patients with anorexia nervosa examined before and after weight gain.  
1390 *Eur. J. Nutr.* Sep 2005;44(6):355-359.
- 1391 92. Hebebrand J, Blum WF, Barth N, et al. Leptin levels in patients with anorexia  
1392 nervosa are reduced in the acute stage and elevated upon short-term weight  
1393 restoration. *Mol. Psychiatry.* Jul 1997;2(4):330-334.
- 1394 93. Housova J, Anderlova K, Krizova J, et al. Serum adiponectin and resistin  
1395 concentrations in patients with restrictive and binge/purge form of anorexia  
1396 nervosa and bulimia nervosa. *J. Clin. Endocrinol. Metab.* Mar 2005;90(3):1366-  
1397 1370.
- 1398 94. Heer M, Mika C, Grzella I, Drummer C, Herpertz-Dahlmann B. Changes in bone  
1399 turnover in patients with anorexia nervosa during eleven weeks of inpatient  
1400 dietary treatment. *Clin. Chem.* May 2002;48(5):754-760.
- 1401 95. Kontogianni MD, Dafni UG, Routsias JG, Skopouli FN. Blood leptin and  
1402 adiponectin as possible mediators of the relation between fat mass and BMD in  
1403 perimenopausal women. *J. Bone Miner. Res.* Apr 2004;19(4):546-551.
- 1404 96. Rubin CT, Capilla E, Luu YK, et al. Adipogenesis is inhibited by brief, daily  
1405 exposure to high-frequency, extremely low-magnitude mechanical signals. *Proc.*  
1406 *Natl. Acad. Sci. U. S. A.* Nov 6 2007;104(45):17879-17884.
- 1407 97. Nedvidkova J, Smitka K, Kopsky V, Hainer V. Adiponectin, an adipocyte-derived  
1408 protein. *Physiol. Res.* 2005;54(2):133-140.
- 1409 98. Halberg N, Henriksen M, Soderhamn N, et al. Effect of intermittent fasting and  
1410 refeeding on insulin action in healthy men. *J. Appl. Physiol.* Dec  
1411 2005;99(6):2128-2136.
- 1412 99. Liu YM, Lacorte JM, Viguerie N, et al. Adiponectin gene expression in  
1413 subcutaneous adipose tissue of obese women in response to short-term very low  
1414 calorie diet and refeeding. *J. Clin. Endocrinol. Metab.* Dec 2003;88(12):5881-  
1415 5886.
- 1416 100. Luo XH, Guo LJ, Yuan LQ, et al. Adiponectin stimulates human osteoblasts  
1417 proliferation and differentiation via the MAPK signaling pathway. *Exp. Cell Res.*  
1418 Sep 10 2005;309(1):99-109.
- 1419 101. Shinoda Y, Yamaguchi M, Ogata N, et al. Regulation of bone formation by  
1420 adiponectin through autocrine/paracrine and endocrine pathways. *J. Cell.*  
1421 *Biochem.* Sep 1 2006;99(1):196-208.
- 1422 102. Kanazawa I, Yamaguchi T, Yano S, Yamauchi M, Yamamoto M, Sugimoto T.  
1423 Adiponectin and AMP kinase activator stimulate proliferation, differentiation, and  
1424 mineralization of osteoblastic MC3T3-E1 cells. *BMC Cell Biol.* 2007;8:51.
- 1425 103. Oshima K, Nampei A, Matsuda M, et al. Adiponectin increases bone mass by  
1426 suppressing osteoclast and activating osteoblast. *Biochem. Biophys. Res.*  
1427 *Commun.* Jun 3 2005;331(2):520-526.
- 1428 104. Modan-Moses D, Stein D, Pariente C, et al. Modulation of adiponectin and leptin  
1429 during refeeding of female anorexia nervosa patients. *J. Clin. Endocrinol. Metab.*  
1430 May 2007;92(5):1843-1847.
- 1431 105. Jurimae J, Rembel K, Jurimae T, Rehand M. Adiponectin is associated with bone  
1432 mineral density in perimenopausal women. *Horm. Metab. Res.* May  
1433 2005;37(5):297-302.
- 1434 106. Lenchik L, Register TC, Hsu FC, et al. Adiponectin as a novel determinant of  
1435 bone mineral density and visceral fat. *Bone.* Oct 2003;33(4):646-651.

- 1436 **107.** Christgau S, Cloos PA. Current and future applications of bone turnover markers.  
1437 *Clin. Lab.* 2003;49(9-10):439-446.
- 1438 **108.** Srivastava AK, Vliet EL, Lewiecki EM, et al. Clinical use of serum and urine bone  
1439 markers in the management of osteoporosis. *Curr. Med. Res. Opin.* Jul  
1440 2005;21(7):1015-1026.
- 1441 **109.** Camacho P, Kleerekoper M. Biochemical Markers of Bone Turnover. In: Favus  
1442 MJ, ed. *Primer on the Metabolic Bone Diseases and Disorders of Mineral*  
1443 *Metabolism*. Sixth ed. Washington, D.C.: American Society for Bone and Mineral  
1444 Research; 2006:127-132.
- 1445 **110.** Garnero P, Delmas PD. Biochemical markers of bone turnover. Applications for  
1446 osteoporosis. *Endocrinol. Metab. Clin. North Am.* Jun 1998;27(2):303-323.
- 1447 **111.** Woitge HW, Pecherstorfer M, Li Y, et al. Novel serum markers of bone  
1448 resorption: clinical assessment and comparison with established urinary indices.  
1449 *J. Bone Miner. Res.* May 1999;14(5):792-801.
- 1450 **112.** Grant FD, Fahey FH, Packard AB, Davis RT, Alavi A, Treves ST. Skeletal PET  
1451 with 18F-fluoride: applying new technology to an old tracer. *J. Nucl. Med.* Jan  
1452 2008;49(1):68-78.
- 1453 **113.** Cook GJ, Fogelman I. The role of positron emission tomography in skeletal  
1454 disease. *Semin. Nucl. Med.* Jan 2001;31(1):50-61.
- 1455 **114.** Blake GM, Park-Holohan SJ, Cook GJ, Fogelman I. Quantitative studies of bone  
1456 with the use of 18F-fluoride and 99mTc-methylene diphosphonate. *Semin. Nucl.*  
1457 *Med.* Jan 2001;31(1):28-49.
- 1458 **115.** Brenner W, Vernon C, Muzi M, et al. Comparison of different quantitative  
1459 approaches to 18F-fluoride PET scans. *J. Nucl. Med.* Sep 2004;45(9):1493-1500.
- 1460 **116.** Messa C, Goodman WG, Hoh CK, et al. Bone metabolic activity measured with  
1461 positron emission tomography and [18F]fluoride ion in renal osteodystrophy:  
1462 correlation with bone histomorphometry. *J. Clin. Endocrinol. Metab.* Oct  
1463 1993;77(4):949-955.
- 1464 **117.** Piert M, Zittel TT, Becker GA, et al. Assessment of porcine bone metabolism by  
1465 dynamic [18F]Fluoride Ion PET: Correlation with bone histomorphometry. *J. Nucl.*  
1466 *Med.* Jul 2001;42(7):1091-1100.
- 1467 **118.** Blake GM, Park-Holohan SJ, Fogelman I. Quantitative studies of bone in  
1468 postmenopausal women using (18)F-fluoride and (99m)Tc-methylene  
1469 diphosphonate. *J. Nucl. Med.* Mar 2002;43(3):338-345.
- 1470 **119.** Petit MA, Beck TJ, Shults J, Zemel BS, Foster BJ, Leonard MB. Proximal femur  
1471 bone geometry is appropriately adapted to lean mass in overweight children and  
1472 adolescents. *Bone.* Mar 2005;36(3):568-576.
- 1473 **120.** Divasta AD, Ringelheim J, Bristol SK, Feldman HA, Gordon CM. Skeletal  
1474 Measurements by Quantitative Ultrasound in Adolescents and Young Women  
1475 with Anorexia Nervosa. *J. Pediatr.* Mar 2007;150(3):286-290 e281.
- 1476 **121.** Divasta AD, Laufer MR, Gordon CM. Bone density in adolescents treated with a  
1477 GnRH agonist and add-back therapy for endometriosis. *J. Pediatr. Adolesc.*  
1478 *Gynecol.* Oct 2007;20(5):293-297.
- 1479 **122.** Haagenson A, Ringelheim J, Feldman HA, Gordon CM. Low prevalence of  
1480 vitamin D deficiency among adolescents with anorexia nervosa. *Pediatric*  
1481 *Academic Societies Annual Meeting.* 2007.
- 1482 **123.** Clowes JA, Hannon RA, Yap TS, Hoyle NR, Blumsohn A, Eastell R. Effect of  
1483 feeding on bone turnover markers and its impact on biological variability of  
1484 measurements. *Bone.* Jun 2002;30(6):886-890.

- 1485 **124.** Rockett HR, Wolf AM, Colditz GA. Development and reproducibility of a food  
1486 frequency questionnaire to assess diets of older children and adolescents. *J. Am.*  
1487 *Diet. Assoc.* Mar 1995;95(3):336-340.
- 1488 **125.** Berkey CS, Rockett HR, Field AE, et al. Activity, dietary intake, and weight  
1489 changes in a longitudinal study of preadolescent and adolescent boys and girls.  
1490 *Pediatrics.* Apr 2000;105(4):E56.
- 1491 **126.** Rifas-Shiman SL, Gillman MW, Field AE, et al. Comparing physical activity  
1492 questionnaires for youth: seasonal vs annual format. *Am. J. Prev. Med.* May  
1493 2001;20(4):282-285.
- 1494 **127.** Taveras EM, Rifas-Shiman SL, Field AE, Frazier AL, Colditz GA, Gillman MW.  
1495 The influence of wanting to look like media figures on adolescent physical  
1496 activity. *J. Adolesc. Health.* Jul 2004;35(1):41-50.
- 1497 **128.** Blair SN, Haskell WL, Ho P, et al. Assessment of habitual physical activity by a  
1498 seven-day recall in a community survey and controlled experiments. *Am. J.*  
1499 *Epidemiol.* Nov 1985;122(5):794-804.
- 1500 **129.** Arroll B, Jackson R, Beaglehole R. Validation of a three-month physical activity  
1501 recall questionnaire with a seven-day food intake and physical activity diary.  
1502 *Epidemiology.* Jul 1991;2(4):296-299.
- 1503 **130.** Beck AT, Brown G, Steer RA. *Beck Depression Inventory II manual.* San  
1504 Antonio, TX: The Psychological Corporation; 1996.
- 1505 **131.** Spielberger CD, Gorsuch RL, Lushene R, Vagg PR, Jacobs GA. *Manual for the*  
1506 *state-trait inventory.* Palo Alto: Consulting Psychologists Press; 1983.
- 1507 **132.** Garner DM, Olmsted MP, Bohr Y, Garfinkel PE. The eating attitudes test:  
1508 psychometric features and clinical correlates. *Psychol. Med.* Nov 1982;12(4):871-  
1509 878.
- 1510 **133.** Beck AT, Ward CH, Mendelson M, Mock J, Erbaugh J. An inventory for  
1511 measuring depression. *Arch. Gen. Psychiatry.* Jun 1961;4:561-571.
- 1512 **134.** Spielberger CD, Gorsuch RL, Lushene R, Vagg PR, Jacobs GA. *Manual for the*  
1513 *state-trait inventory.* Palo Alto: Consulting Psychologists Press; 1983.  
1514  
1515
