# Supplementary material for: Low-Magnitude Mechanical Signals to Preserve Skeletal Health in Female Adolescents With Anorexia Nervosa: A Randomized Clinical Trial
Source: PubMed Central journal article supplement (PMC11528308; doi:10.1001/jamanetworkopen.2024.41779), 2024-10-31
Supplement: jamanetwopen-e2441779-s002.pdf [file jamanetwopen-e2441779-s002.pdf]

## Supplementary Online Content

DiVasta AD, Stamoulis C, Rubin CT, et al. Preservation of skeletal health in ambulatory female adolescents with anorexia nervosa: a randomized clinical trial. *JAMA Netw Open*. 2024;7(10):e2441779. doi:10.1001/jamanetworkopen.2024.41779

**eTable 1.** Demographic and clinical data for n = 21 participants with %mBMI  $\leq$  85

**eTable 2.** Demographic and clinical data for n = 8 severely malnourished patients with %mBMI  $\leq$  80

**eTable 3.** Measures of radial pQCT at baseline and after 6 months of LMMS treatment or placebo in young women with anorexia nervosa (N = 50)

This supplementary material has been provided by the authors to give readers additional information about their work.

**eTable 1.** Demographic and clinical data for n = 21 participants with %mBMI ≤ 85

|                                    | <b>Participants with %mBMI ≤ 85<br/>(n = 21)</b> |              |
|------------------------------------|--------------------------------------------------|--------------|
|                                    | Median (IQR)                                     | Min, Max     |
| <b>Age, y</b>                      | 17.1 (5.2)                                       | 12.6, 26.1   |
| <b>Height, cm</b>                  | 161.3 (6.1)                                      | 154.9, 174.5 |
| <b>Weight, kg</b>                  | 43.3 (5.6)                                       | 36.8, 51.9   |
| <b>BMI, kg/m<sup>2</sup></b>       | 16.4 (1.3)                                       | 14.6, 18.2   |
| <b>% of median BMI for age</b>     | 80.2 (5.1)                                       | 68.5, 84.8   |
| <b>Duration of AN, mos</b>         | 6.0 (39.5)                                       | 0, 120.0     |
| <b>Duration of amenorrhea, mos</b> | 5.5 (4.0)                                        | 0, 78.0      |
| <b>Age at menarche, y</b>          | 12.0 (2.0)                                       | 10.0, 14.0   |
| <b>25(OH)D, ng/mL</b>              | 37.5 (16.2)                                      | 18.3, 68.1   |
| <b>PTH, pg/mL</b>                  | 17.0 (8.8)                                       | 8.0, 36.0    |
| <b>DXA MEASURES</b>                |                                                  |              |
| <b>Total body Z-score</b>          | -0.6 (1.3)                                       | -3.3, 1.4    |
| <b>Spine Z-score</b>               | -1.0 (1.1)                                       | -2.8, 0.2    |
| <b>Total hip Z-score</b>           | -0.7 (1.5)                                       | -3.1, 1.8    |
| <b>N (%)</b>                       |                                                  |              |
| <b>DXA Total body:</b>             |                                                  |              |
| <b>Z ≤ -1</b>                      | 9 (42.9)                                         |              |
| <b>Z ≤ -2</b>                      | 2 (9.5)                                          |              |
| <b>DXA Spine:</b>                  |                                                  |              |
| <b>Z ≤ -1</b>                      | 11 (52.4)                                        |              |
| <b>Z ≤ -2</b>                      | 2 (9.5)                                          |              |
| <b>DXA Total hip:</b>              |                                                  |              |
| <b>Z ≤ -1</b>                      | 10 (47.6)                                        |              |
| <b>Z ≤ -2</b>                      | 2 (9.5)                                          |              |

%mBMI, % of median body mass index for age; LMMS, low-magnitude mechanical stimulation; IQR, interquartile range; BMI, body mass index; AN, anorexia nervosa; 25(OH)D, 25-hydroxy-vitamin D; PTH, parathyroid hormone; DXA, dual energy X-ray absorptiometry

**eTable 2.** Demographic and clinical data for n = 8 severely malnourished patients with %mBMI ≤ 80

|                            | Participants with %mBMI ≤ 80<br>(n = 8) |              |
|----------------------------|-----------------------------------------|--------------|
|                            | Median (IQR)                            | Min, Max     |
| Age, y                     | 16.9 (2.3)                              | 14.2, 23.5   |
| Height, cm                 | 162.5 (8.8)                             | 154.9, 174.5 |
| Weight, kg                 | 40.2 (4.3)                              | 36.8, 49.6   |
| BMI, kg/m <sup>2</sup>     | 16.1 (1.3)                              | 14.6, 16.6   |
| % of median BMI for age    | 77.5 (5.9)                              | 68.5, 79.1   |
| Duration of AN, mo         | 2.5 (21.5)                              | 0, 88.0      |
| Duration of amenorrhea, mo | 6.0 (4.0)                               | 1.0, 78.0    |
| Age at menarche, y         | 13.0 (1.8)                              | 11.0, 14.0   |
| 25(OH)D, ng/mL             | 31.8 (14.2)                             | 18.3, 47.1   |
| PTH, pg/mL                 | 17.0 (9.6)                              | 8.0, 36.0    |
| <b>DXA MEASURES</b>        |                                         |              |
| Total body Z-score         | -0.5 (1.5)                              | -3.3, 1.4    |
| Spine Z-score              | -1.1 (1.2)                              | -2.8, 0.2    |
| Total hip Z-score          | -0.2 (1.3)                              | -3.1, 1.8    |
| <b>N (%)</b>               |                                         |              |
| <b>DXA Total body:</b>     |                                         |              |
| Z ≤ -1                     |                                         | 3 (37.5)     |
| Z ≤ -2                     |                                         | 1 (12.5)     |
| <b>DXA Spine:</b>          |                                         |              |
| Z ≤ -1                     |                                         | 5 (62.5)     |
| Z ≤ -2                     |                                         | 1 (12.5)     |
| <b>DXA Total hip:</b>      |                                         |              |
| Z ≤ -1                     |                                         | 2 (25.0)     |
| Z ≤ -2                     |                                         | 1 (12.5)     |

%mBMI, % of median body mass index for age; LMMS, low-magnitude mechanical stimulation; IQR, interquartile range; BMI, body mass index; AN, anorexia nervosa; 25(OH)D, 25-hydroxy-vitamin D; PTH, parathyroid hormone; DXA, dual energy X-ray absorptiometry

**eTable 3.** Measures of radial pQCT at baseline and after 6 months of LMMS treatment or placebo in young women with anorexia nervosa (N = 50)

| <b>Radius 4% site (non-weight-bearing trabecular bone)</b> |         |               |               |      |      |
|------------------------------------------------------------|---------|---------------|---------------|------|------|
| Total bone vBMD (mg/cm <sup>3</sup> )                      |         |               |               |      |      |
|                                                            | LMMS    | 321.1 (67.4)  | 332.8 (34.8)  | 0.32 | 0.26 |
|                                                            | Placebo | 346.6 (46.2)  | 337.8 (22.5)  | 0.53 |      |
| Trabecular vBMD (mg/cm <sup>3</sup> )                      |         |               |               |      |      |
|                                                            | LMMS    | 215.7 (37.8)  | 218.6 (19.4)  | 0.90 | 0.40 |
|                                                            | Placebo | 211.9 (38.7)  | 221.4 (14.3)  | 0.50 |      |
| Total bone CSA (mm <sup>2</sup> )                          |         |               |               |      |      |
|                                                            | LMMS    | 253.4 (68.3)  | 257.6 (32.3)  | 0.85 | 0.88 |
|                                                            | Placebo | 258.1 (70.5)  | 260.9 (21.9)  | 0.80 |      |
| Trabecular CSA (mm <sup>2</sup> )                          |         |               |               |      |      |
|                                                            | LMMS    | 192.3 (58.2)  | 180.5 (41.6)  | 0.29 | 0.29 |
|                                                            | Placebo | 176.2 (74.5)  | 181.0 (54.5)  | 0.54 |      |
| Cortical vBMD (g/cm <sup>3</sup> )                         |         |               |               |      |      |
|                                                            | LMMS    | 583.0 (78.2)  | 600.2 (89.3)  | 0.60 | 0.13 |
|                                                            | Placebo | 631.9 (90.4)  | 601.1 (71.3)  | 0.19 |      |
| <b>Radius 66% site (non-weight-bearing cortical bone)</b>  |         |               |               |      |      |
| Total bone vBMD (mg/cm <sup>3</sup> )                      |         |               |               |      |      |
|                                                            | LMMS    | 731.5 (108.1) | 707.5 (28.8)  | 0.20 | 0.12 |
|                                                            | Placebo | 711.7 (135.4) | 710.1 (25.8)  | 0.57 |      |
| Total bone CSA (mm <sup>2</sup> )                          |         |               |               |      |      |
|                                                            | LMMS    | 109.3 (28.7)  | 111.0 (10.6)  | 0.42 | 0.68 |
|                                                            | Placebo | 114.2 (35.0)  | 114.3 (10.5)  | 0.60 |      |
| Cortical vBMD (g/cm <sup>3</sup> )                         |         |               |               |      |      |
|                                                            | LMMS    | 1093.4 (50.7) | 1096.3 (38.4) | 0.37 | 0.20 |
|                                                            | Placebo | 1080.4 (74.0) | 1082.3 (31.9) | 0.78 |      |
| Cortical CSA (mm <sup>2</sup> )                            |         |               |               |      |      |
|                                                            | LMMS    | 66.7          | 64.9 (6.7)    | 0.97 | 0.91 |
|                                                            | Placebo | 62.8          | 66.4 (5.9)    | 0.59 |      |

|                                             |         |                |                |      |      |
|---------------------------------------------|---------|----------------|----------------|------|------|
| Cortical thickness (mm)                     | LMMS    | 2.18 (0.4)     | 2.16 (0.2)     | 0.52 | 0.48 |
|                                             | Placebo | 2.11 (0.6)     | 2.15 (0.2)     | 0.50 |      |
| Cortical section modulus (mm <sup>3</sup> ) | LMMS    | 309.6 (81.2)   | 314.2 (53.7)   | 0.19 | 0.27 |
|                                             | Placebo | 323.7 (143.2)  | 316.9 (37.5)   | 0.82 |      |
| Max. muscle CSA (mm <sup>2</sup> )          | LMMS    | 2063.0 (340.2) | 2204.2 (207.1) | 0.21 | 0.96 |
|                                             | Placebo | 2113.8 (446.5) | 2245.6 (172.0) | 0.32 |      |
| Strength-Strain Index (mm <sup>3</sup> )    | LMMS    | 251.3 (78.3)   | 253.8 (48.4)   | 0.49 | 0.47 |
|                                             | Placebo | 252.7 (78.8)   | 256.1 (36.1)   | 0.89 |      |

\* Estimates adjusted for patient age, duration of AN, and weight gain  
LMMS, low-magnitude mechanical stimulation; vBMD, volumetric bone mineral density; CSA, cross-sectional area
