# Supplementary material for: Low-Magnitude Mechanical Signals to Preserve Skeletal Health in Female Adolescents With Anorexia Nervosa: A Randomized Clinical Trial
Source: PubMed Central journal article supplement (PMC11528308; doi:10.1001/jamanetworkopen.2024.41779), 2024-10-31
Supplement: jamanetwopen-e2441779-s003.pdf [file jamanetwopen-e2441779-s003.pdf]

## Data Sharing Statement

DiVasta. Preservation of Skeletal Health in Ambulatory Female Adolescents With Anorexia Nervosa. *JAMA Netw Open*. Published October 31, 2024.  
doi:10.1001/jamanetworkopen.2024.41779

### Data

**Additional Information:** clinicaltrials.gov NCT01100567

**Data available:** Yes

**Data types:** Deidentified participant data

**How to access data:** [amy.divasta@childrens.harvard.edu](mailto:amy.divasta@childrens.harvard.edu)

**When available:** With publication

### Supporting Documents

**Document types:** None

### Additional Information

**Who can access the data:** researchers whose proposed use of the data has been approved

**Types of analyses:** For questions related to evidence based care of patients with anorexia nervosa

**Mechanisms of data availability:** After approval of a proposal and a signed data access agreement across institutions
